# 1 Pathformer: biological pathway informed Transformer model 2 integrating multi-modal data of cancer

3  
4 Xiaofan Liu<sup>1,2</sup>, Yuhuan Tao<sup>1,2</sup>, Zilin Cai<sup>1</sup>, Pengfei Bao<sup>1,2</sup>, Hongli Ma<sup>1,2</sup>, Kexing Li<sup>1</sup>, Yunping Zhu<sup>3, \*</sup>, Zhi John Lu<sup>1,2</sup>,

5 \*

6 <sup>1</sup>MOE Key Laboratory of Bioinformatics, Center for Synthetic and Systems Biology, School of Life Sciences, Tsinghua  
7 University, Beijing 100084, China.

8 <sup>2</sup>Institute for Precision Medicine, Tsinghua University, Beijing 100084, China.

9 <sup>3</sup>State Key Laboratory of Proteomics, Beijing Proteome Research Center, National Center for Protein Sciences (Beijing),  
10 Beijing Institute of Lifeomics, 38 Life Science Park, Changping District, Beijing 102206, China

11 \*To whom correspondence should be addressed: Zhi John Lu, Tel: +86 10 62789217, E-mail:  
12 [zhilu@tsinghua.edu.cn](mailto:zhilu@tsinghua.edu.cn); Yunping Zhu, Tel.: +86 10 61777058, E-mail: [zhuyunping@ncpsb.org.cn](mailto:zhuyunping@ncpsb.org.cn).

## 13 Abstract

14 Multi-modal biological data integration can provide comprehensive views of gene regulation and cell development.  
15 However, conventional integration methods rarely utilize prior biological knowledge and lack interpretability. To  
16 address these challenges, we developed Pathformer, a biological pathway informed deep learning model based on  
17 Transformer with bias to integrate multi-modal data. Pathformer leverages criss-cross attention mechanism to  
18 capture crosstalk between different biological pathways and between different modalities (i.e., multi-omics). It also  
19 utilizes SHapley Additive Explanation method to reveal key pathways, genes, and regulatory mechanisms. Through  
20 benchmark studies on 28 TCGA datasets, we demonstrated the superior performance and interpretability of  
21 Pathformer on various cancer classification tasks, compared to other integration models. Furthermore, we applied  
22 Pathformer to liquid biopsy multi-modal data integration with high accuracy in cancer diagnosis. Meanwhile,  
23 Pathformer revealed interesting molecularly altered pathways in cancer patients' body fluid, such as ligand binding  
24 of scavenger receptors, iron transport, and DAP12 signaling transmission, which are related to extracellular vesicle  
25 transport, platelet, and immune response.

26 **Keywords:** Multi-modal integration; Transformer; Pathway crosstalk network; Cancer diagnosis; Liquid biopsy.

27

28

## 29 **Introduction**

30 The rapid progress in high-throughput technologies has made it possible to curate multi-modal data for disease  
31 studies using genome-wide platforms. These platforms can analyze different molecular alterations in the same  
32 samples, such as DNA variances (e.g., mutation, methylation, and copy number variance) and RNA alterations (e.g.,  
33 expression, alternative promoter, splicing, and editing). Integrating these multi-modal data offers a more  
34 comprehensive view of gene regulation in diseases (e.g., cancer) than analyzing single type of data<sup>1</sup>. For instance,  
35 multi-modal data integration is helpful in addressing certain key challenges of cancer diagnosis and prognosis, such  
36 as heterogeneity of intra- and inter-cancer, and complex molecular interactions<sup>2</sup>. Therefore, there is a pressing need  
37 for advanced computational methods that uncover interactions of multi-modal data in cancer.

38 Current algorithms for integrating multi-modal data can be broadly categorized into three groups: early  
39 integration models that merge multi-modal data into a single matrix<sup>3,4</sup>, late integration models that process each  
40 modality separately and then combine their outputs through averaging or maximum voting<sup>5,6</sup>, and intermediate  
41 integration models that dynamically merge multi-modal data<sup>7,8</sup>. Recently, instead of previous methods that mainly  
42 focus on unsupervised problems, several supervised algorithms have been proposed for classifying diseases. For  
43 example, mixOmics uses latent component analysis to find common features among multi-modal data<sup>9</sup>. Wang et al.  
44 proposed multi-omics graph convolutional networks (MOGONet), a late integration model that uses graph  
45 convolutional networks for modal-specific learning and view correlation discovery network for multi-modal  
46 integration<sup>10</sup>. Moon et al. proposed two modal data integration and interpretation algorithm (MOMA) that utilizes  
47 attention mechanisms to extract important modules<sup>11</sup>. These methods rely on computational inference to capture  
48 relationship between modalities, but ignore the immensely informative prior biological knowledge such as  
49 regulatory networks.

50 To improve the interpretability, several studies have attempted to incorporate prior biological knowledge  
51 into deep learning models for multi-modal data integration. For instance, Ma et al. proposed a visible neural network  
52 that combines with biological pathways to model the impact of gene interactions on yeast cell growth<sup>12</sup>. Meanwhile,  
53 pathway-associated sparse deep neural network (PASNet) was utilized to accurately predict the prognosis of  
54 glioblastoma multiforme (GBM) patients<sup>13</sup>. Recently, a sparse neural network integrating multiple molecular  
55 features based on a multilevel view of biological pathways, P-net, was published for the classification of prostate  
56 cancer patients<sup>14</sup>. Another method, PathCNN, was developed to predict survival of GBM patient by using principal  
57 component analysis (PCA) algorithms to define multi-modal pathway images and a convolutional neural network<sup>15</sup>.  
58 However, these algorithms rarely considered the synergy and nonlinear relationships between pathways. Given the

59 complexity of biological systems, understanding the pathway crosstalk is crucial for comprehending more complex  
60 diseases<sup>16</sup>, which can help deep learning models better capture multi-modal interactions.

61 Inspired by these prior works, we propose Pathformer, which combines pathway crosstalk networks and the  
62 Transformer encoder with bias for the interpretation and classification of multi-modal data in cancer. Recently,  
63 Transformer has demonstrated its capability in handling multi-modal tasks in computational fields<sup>17</sup>. It hasn't been  
64 applied to the biological multi-modal data for lack of reliable biological embedding methods and solutions to the  
65 memory explosion posed by the vast amount of gene inputs. These challenges are addressed by Pathformer. First,  
66 Pathformer uses multiple statistical indicators of multi-modal data as gene embedding, which comprehensively  
67 describes different perspectives of gene information. Second, Pathformer utilizes a sparse neural network based on  
68 prior pathway knowledge to transform gene embeddings into pathway embeddings, which not only captures  
69 valuable information but also addresses memory explosion issue. Third, Pathformer incorporates pathway crosstalk  
70 networks into the Transformer model with bias to enhance the exchange of information between different modalities  
71 and pathways.

72 As far as we are aware, Pathformer is the first biological multi-modal integration model that combines prior  
73 pathways knowledge and Transformer encoder model. We evaluated Pathformer on 28 benchmark datasets of the  
74 Cancer Genome Atlas (TCGA)<sup>18</sup> and demonstrated its superior performance and biological interpretability on  
75 various cancer classification tasks, compared to other integration models. Pathformer was applied to liquid biopsy  
76 data, which not only showed high accuracy for noninvasive cancer diagnosis but revealed interesting molecularly  
77 altered pathways in human plasma.

78

## 79 **Results**

### 80 **The Pathformer model**

81 Pathformer utilizes biological pathway network and a Transformer encoder to allow better information fusion. It  
82 has six modules: biological pathway input, pathway crosstalk network calculation, multi-modal data input,  
83 biological multi-modal embedding, Transformer module with pathway crosstalk network, and classification module  
84 (**Fig. 1a**, see **Methods** for details). Pathformer uses biological multi-modal data and biological pathway information  
85 as input, and define biological multi-modal embedding (gene embedding and pathway embedding). It then enhances  
86 the fusion of information between various modalities and pathways by combining pathway crosstalk networks with

87 Transformer encoder. Finally, a fully connected layer serves as the classifier.

88 We curated all pathways from four public databases, then selected 1,497 pathways based on the criterion of  
89 gene number, overlap ratio with other pathways, and the number of pathway subsets. Next, we used *BinoX<sup>19</sup>*, a  
90 classic tool for crosstalk analysis, to calculate the crosstalk relationships among the 1,497 pathways. Based on these  
91 relationships, we created a pathway crosstalk network as Pathformer's input (see **Methods** and **Supplementary**  
92 **Notes**).

93 Multi-modal biological data preprocessing and embedding are crucial components of Pathformer (**Fig. 1b**). We  
94 preprocessed the raw sequence reads of DNA-seq and RNA-seq into multi-modal data, including DNA methylation,  
95 DNA copy number, and different RNA alterations (see **Methods** and **Supplementary Notes**). These multi-modal  
96 data are on different levels, such as nucleotide level, fragment level, and gene level, which significantly influence  
97 data integration. To address this, we used multiple statistical indicators as gene embeddings to retain the gene  
98 diversity across different modalities (see **Fig. 1b** and **Methods**). Subsequently, we used the known gene-pathway  
99 mapping relationship to develop a sparse neural network based on prior pathway knowledge (PSNN) to transform  
100 gene embedding into pathway embedding. The PSNN has two layers representing genes and pathways, respectively.  
101 These two layers are not fully connected, but rather share a connection pruned based on the pathway and gene  
102 inclusion relationships. If there is no correlation between a given gene and a given pathway, the connection weight  
103 between two neurons is set to be 0; otherwise, it is learned through training (see **Methods**). Therefore, pathway  
104 embedding is a dynamic embedding method. The PSNN can not only restore the mapping relationship between  
105 genes and pathways, but also identify important genes in different pathways through trained weights, and can  
106 transfer the complementarity of modalities at the gene level to the pathway level. Additionally, this biological multi-  
107 modal embedding step does not require additional gene selection, thereby avoiding bias and overfitting problems  
108 resulting from artificial feature selection.

109 Transformer module with pathway crosstalk network bias is the key module of Pathformer model (**Fig. 1c**).  
110 Inspired by the Evoformer model used in AlphaFold<sup>20</sup> for processing multiple sequences, we developed the  
111 Transformer module based on criss-cross attention (CC-attention) with bias for data fusion of pathways and  
112 modalities. Particularly, multi-head column-wise self-attention (col-attention) is used to enhance the exchange of  
113 information between pathways, with the pathway crosstalk network matrix serving as the bias for col-attention to  
114 guide the flow of information. Multi-head row-wise self-attention (row-attention) is employed to facilitate  
115 information exchange between different modalities, and the updated multi-modal embedding matrix is used to  
116 update the pathway crosstalk network matrix by calculating the correlation between pathways. More details of the

117 Transformer module are described in **Methods**.

## 118 **Pathformer outperforms existing multi-modal integration methods in various classification** 119 **tasks using TCGA datasets**

120 To evaluate the performance of Pathformer, we tested model on various cancer classification tasks as benchmark  
121 studies: cancer early- and late- stage classification (10 TCGA cancer datasets), low- and high- survival risk  
122 classification (10 TCGA cancer datasets), and cancer subtype classification (8 TCGA cancer datasets) (see  
123 **Supplementary Fig. 1** and **Supplementary Notes**). For these tasks, DNA methylation, DNA CNV, and RNA  
124 expression were used as input. For model training and test, we performed 2 times 5-fold cross-validation that divided  
125 the data into a discovery set (75%) and a validation set (25%) for each test (see **Supplementary Fig. 1** and **Methods**).  
126 We first optimized hyperparameters using 5-fold cross-validation on the discovery set, with macro-averaged F1  
127 score as the criterion for grid search. The results of optimal hyperparameter combination for each dataset are listed  
128 in **Supplementary Fig. 2** and **Supplementary Table 1**. Then, we trained Pathformer using the discovery set with  
129 early stopping and tested it on the validation set.

130 We compared the classification performance of Pathformer with several existing multi-modal integration  
131 methods, including early integration methods based on base classifiers, i.e., nearest neighbor algorithm (KNN),  
132 support vector machine (SVM), logistic regression (LR), random forest (RF), and extreme gradient boosting  
133 (XGBoost); late integration methods based on KNN, SVM, LR, RF, and XGBoost; partial least squares-discriminant  
134 analysis (PLSDA) and sparse partial least squares-discriminant analysis (sPLSDA) of mixOmics<sup>9</sup>; two deep  
135 learning-based integration methods, MOGONet<sup>10</sup> and PathCNN<sup>15</sup>. MOGONet is a multi-modal integration method  
136 based on graph convolutional neural network. PathCNN is a representative multi-modal integration method that  
137 combines pathway information. During comparison methods, the multi-modal data were preprocessed with the  
138 statistical indicators and features were prefiltered with ANOVA as input (see **Supplementary Notes**).

139 Pathformer consistently outperformed the other integration methods in most classification tasks, evaluated by  
140 macro-averaged F1 score (F1score\_macro) (**Fig. 2**), as well as area under the receiver operating characteristic curve  
141 (AUC) and average F1 score weighted by support (F1score\_weighted) (**Supplementary Fig. 3** and **Supplementary**  
142 **Table 2**). We showed F1score\_macro in the main figure because it is a more robust measurement than the other two  
143 scores for the imbalanced classes. In the cancer stage classification and survival classification tasks, Pathformer  
144 achieved the best F1score\_macro and F1score\_weighted in all the 10 datasets, and the best AUC in 8 of 10 datasets.  
145 In cancer subtype classification of TCGA, Pathformer achieved the best F1score\_macro in 7 of 8 datasets, the best

146 F1score\_weighted in 6 of 8 datasets, and the best AUC in 6 of 8 datasets. Notably, Pathformer substantially  
147 outperformed the other methods in the challenging classification tasks like cancer early- and late- stage classification  
148 and low- and high- survival risk classification, showing average increases of 11% and 15% in F1score\_marco  
149 compared with XGBoost, respectively. This highlights Pathformer's exceptional learning ability. Moreover, in terms  
150 of stability, Pathformer also showed significantly better generalization ability than the other deep learning  
151 algorithms, as indicated by the cross-validation variances (**Supplementary Fig. 4**).

### 152 **Ablation analysis shows that Pathformer benefits from multi-modal integration, attention** 153 **mechanism and pathway crosstalk network**

154 We used ablation analysis to evaluate the essentialities of each type of data and each module of model in the multi-  
155 model data integration of Pathformer, based on nine datasets of cancer early- and late- stage classification. First, we  
156 evaluated the essentialities of seven different data inputs, including RNA expression, DNA methylation, DNA CNV,  
157 and a combination thereof (**Fig. 3a**). By comparing the classification performances of seven models, we discovered  
158 that the model with all three modalities as input achieved the best performance, followed by RNA expression-only  
159 and DNA methylation-only model. Furthermore, we observed that the performances of models with single modality  
160 can vary greatly between datasets. For example, DNA methylation-only model performed better than RNA  
161 expression-only and DNA CNV-only in the KIRC dataset, but the opposite performances were observed in the  
162 LUAD dataset. These findings suggest that different modalities have disparate behaviors in different cancer types,  
163 and emphasized the necessity of multi-modal data integration in various cancer classification tasks.

164 Next, we also evaluated the essentialities of different modules in Pathformer. We developed 4 models, namely  
165 CC-attention, Transformer, PSNN, and NN, which successively remove one to multiple modules of Pathformer.  
166 CC-attention is a model without pathway crosstalk network bias. Transformer is a model without either pathway  
167 crosstalk network bias or row-attention. PSNN is a model that directly uses classification module with pathway  
168 embedding as input. NN is a model that directly uses classification module with gene embedding as input. As shown  
169 in **Fig. 3b**, the complete Pathformer model achieved the best classification performance, while the performance of  
170 CC-Attention, Transformer, PSNN, and NN decreased successively. Transformer had a significantly lower  
171 classification performance compared to CC-Attention, but no significant improvement compared to PSNN. This  
172 indicates that the criss-cross attention mechanism (**Fig. 1c**) plays a key role in Pathformer, with respect to  
173 information fusion and crosstalk between different biological pathways and between different modalities (i.e., multi-  
174 omics).

## 175 **Biological interpretability of the Pathformer model**

176 To comprehend Pathformer's decision-making process, we used averaging attention maps in row-attention to  
177 represent the contributions of different modalities, and SHapley Additive exPlanations<sup>21</sup> (SHAP value) to decipher  
178 the important pathways and their key genes (see **Methods**). SHAP value is a post hoc model interpretation method  
179 that assigns an importance value to each feature to explain the relationship between features and classification<sup>21</sup>. In  
180 addition, the z-score of SHAP values of different modalities for each pathway and gene can demonstrate modal  
181 complementarity at the gene level and the pathway level. Finally, the hub module of the updated pathway crosstalk  
182 network represents the most critical regulatory mechanism in classification, and is screened by sub-network scores  
183 based on SHAP values of pathways. Links of the updated network indicate crosstalk relationships that affect  
184 classification tasks (see **Methods**).

185 Here, we demonstrated the interpretability of Pathformer using the breast cancer subtype classification task as  
186 an example (**Fig. 4**). First, at the modality level, we visualized the contributions of different modalities for breast  
187 cancer subtype classification by the attention weights (**Fig. 4a**). The contribution of transcriptomic data was greater  
188 than 50% in breast cancer subtype classification, which is consistent with the fact that PAM50 is defined based on  
189 transcriptomic data<sup>22</sup>. Combining with the results of other classification tasks for breast cancer (**Supplementary**  
190 **Figs. 5a, 6a**), we observed that transcriptome always played a crucial role in various classification tasks; DNA CNV  
191 had certain contribution in subtype classification; and DNA methylation contributed substantially in early- and late-  
192 stage classification. In addition, the contributions of various statistical indicators in the same modality were also  
193 different for different classification tasks. For example, mean of DNA CNV played an important role in subtype  
194 classification, while minimum of DNA CNV had greater contribution in stage classification and survival  
195 classification. These findings further validated the necessity of multi-modal integration and biological multi-modal  
196 embedding.

197 Next, at the pathway and gene level, we identified the pathways with top 15 SHAP value and the genes with  
198 top 5 SHAP value of each pathway as key genes in breast cancer subtype classification (**Fig. 4b**). Then, we presented  
199 a hub module of the updated pathway crosstalk network (**Fig. 4c**). Here, *complex I biogenesis* pathway was  
200 identified as the most critical pathway in breast cancer subtype classification and a key node in the hub module of  
201 the updated pathway crosstalk network. This pathway comprises 57 genes, including mitochondrial genes and  
202 protein-coding genes. Complex I participates in the biosynthesis and redox control during cancer cell proliferation  
203 and metastasis<sup>23</sup>. Five mitochondrial genes (MT-ND3, MT-ND1, MT-ND4, MT-ND2, and MT-ND6) were identified  
204 as key genes of the *complex I biogenesis* pathway in breast cancer subtype classification by Pathformer. These



205 mitochondrial genes have been reported to exhibit distinct patterns in different breast cancer subtypes<sup>24</sup>. In addition,  
206 in the hub module of the updated pathway crosstalk network, *complex I biogenesis* pathway was closely related to  
207 *TP53-regulated metabolic genes* pathway and *signaling by ERBB4* pathway, and has been identified as the most  
208 critical regulatory mechanism for breast cancer subtype classification. According to literatures, TP53 mutation  
209 spectrum<sup>25</sup> and ERBB4<sup>26</sup> are biomarkers for breast cancer subtypes.

210 Moreover, many other important pathways identified by Pathformer for breast cancer subtype classification  
211 have also already been reported previously (**Fig. 4b**). For example, the expression of *nucleotide excision repair*  
212 pathway is reduced in TNBC, which may affect survival after platinum chemotherapy of patients<sup>27</sup>. RFC4 is the key  
213 gene of this pathway, and DNA CNV of RFC4 was reported to play a crucial role in determining individual breast  
214 cancer subtypes<sup>28</sup>, which is consistent with the prediction of the gene's pillar module by Pathformer. Key genes of  
215 *transcription of E2F targets under negative control by p107 and p130 in complex with HDAC1* pathway were  
216 identified as E2F1, HDAC1, RBBP4, CCNA2, and CDK1 by Pathformer. Most E2F family genes expressions are  
217 significantly up-regulated in TNBC, and are predictive biomarkers of neoadjuvant therapies in patients with ER-  
218 positive/HER2-negative tumors<sup>29</sup>. In addition to the transcriptome level, DNV CNV of E2F1 is also a susceptibility  
219 factor for breast cancer<sup>30</sup>, again consistent with the prediction of the gene's pillar module by Pathformer. HDAC1  
220 is significantly lower in HER2-positive and TNBC compared to luminal A and luminal B<sup>31</sup>.

221 Similarly, we also analyzed important pathways and hub modules of the updated pathway crosstalk network in  
222 breast cancer early- and late-stage classification and high- and low-risk survival classification (**Supplementary**  
223 **Figs. 5,6**). We found that *complex I biogenesis* pathway always played a crucial role in different classification tasks  
224 of breast cancer, due to its connection between various cancer-related pathways. Particularly, in breast cancer early-  
225 and late-stage classification, *iron uptake and transport* pathway had the greatest impact. Supportively, the transport  
226 and storage of iron in cells are known to play a key role in carcinogenesis, cell proliferation, and the development  
227 of breast cancer<sup>32</sup>. Furthermore, we found that some pathways were more important in early- and late-stage  
228 classification than in subtype classification and survival classification, such as *collagen biosynthesis and modifying*  
229 *enzymes* pathway, *Eph/ephrin signaling* pathway, *FRA* pathway, and *G1* pathway. *Roles of LAT2/NTAL/LAB in*  
230 *calcium mobilization* pathway was more important in survival classification than in the other classification tasks,  
231 which was consistent with calcium signaling pathway's function in breast cancer cells' proliferation, invasion,  
232 apoptosis, and multidrug resistance, and with breast cancer survival<sup>33</sup>.



## 233 **Application of Pathformer to liquid biopsy data for non-invasive cancer diagnosis**

234 Liquid biopsy is a non-invasive detection way with important clinical applications in both cancer diagnosis and  
235 status monitoring, which provides comprehensive information on transcriptome dynamics<sup>34</sup>. RNA alterations reflect  
236 the complementarity between different levels of information and help to overcome missed detection results of single  
237 data to further improve the accuracy of cancer diagnosis. Therefore, we used Pathformer to integrate multi-modal  
238 data of liquid biopsies for classifying cancer patients from healthy controls. We applied Pathformer to three cell-  
239 free RNA-seq datasets derived from three different blood components: plasma, extracellular vesicle (EV), and  
240 platelet datasets (see **Methods**).

241 We calculated seven RNA-level modalities from RNA-seq data as Pathformer's input, including RNA  
242 expression, RNA splicing, RNA editing, RNA alternative promoter (RNA alt. promoter), RNA allele-specific  
243 expression (RNA ASE), RNA single nucleotide variations (RNA SNV), and chimeric RNA. From results of 5-fold  
244 cross-validation in **Supplementary Fig. 7**, we found that the model with all modalities as input had the best  
245 comprehensive performance on three datasets, followed by RNA expression-only model and RNA alt. promoter-  
246 only model, and some models with other modalities exhibited great fluctuations on different datasets. In order to  
247 effectively integrate information without redundancy, we performed further feature selection based on different  
248 modality combinations evaluated by Pathformer. First, we calculated the contributions of each modality and its  
249 corresponding statistical indicators (**Fig. 5a**). Similar to results of cross-validation, RNA expression was the core  
250 modality across all datasets. Next, we performed 5-fold cross-validation find an optimal modality combination for  
251 each dataset (**Fig. 5b, Supplementary Table 3**). We found that plasma dataset with 7 modalities, EV dataset with 3  
252 modalities, and platelet dataset with 3 modalities obtained the best performance. The AUCs were higher than 0.9  
253 for all three datasets. In conclusion, Pathformer effectively integrated multi-modal data from human plasma, and  
254 accurately classified cancer patients from healthy controls.

## 255 **Pathformer reveals deregulated pathways and genes in cancer patients' plasma**

256 Because the Pathformer model has biological interpretability, we used Pathformer to predict cancer related pathways  
257 and genes in the above liquid biopsy data (**Fig. 6**). Then, we can gain insight into the deregulated alterations in body  
258 fluid (i.e., plasma) for cancer patients vs. healthy controls.

259 First, in comparison to cancer tissue data (**Fig. 4, Supplementary Fig. 6**), we found that vesicle transport and  
260 coagulation related pathways occupied an important position in datasets of various blood components, which is  
261 consistent with the characteristics of body fluids (**Fig. 6a-c**). Furthermore, we also observed that active pathways

262 and key genes of plasma dataset were more similar to those in platelet dataset, which is consistent with a recent  
263 report showing platelet is a major origin in the plasma cell-free transcriptome<sup>35</sup>.

264 Next, we examined there interesting pathways: one was found in EV data and the others were revealed from  
265 platelet data. In both EV and plasma datasets, we found that *binding and uptake of ligands* (e.g., oxidized low-  
266 density lipoprotein, oxLDL) *by scavenger receptors* pathway was identified as the most active pathway (**Fig. 6a, b**).  
267 It is well established that scavenger receptors play a crucial role in cancer prognosis and carcinogenesis by  
268 promoting the degradation of harmful substances and accelerating the immune response through endocytosis,  
269 phagocytosis, and adhesion<sup>36</sup>. Scavenger receptors are also closely related to the transport process of vesicles. For  
270 example, stabilin-1, a homeostatic receptor, has the potential to impact macrophage secretion by linking  
271 extracellular signals and intracellular vesicular processes<sup>37</sup>. Meanwhile, HBB, HBA1, HBA2, FTH1, HSP90AA1  
272 were identified as key genes in this pathway. HBB has been reported as a biomarker in thyroid cancer<sup>38</sup>, breast  
273 cancer<sup>39</sup>, and gastric cancer<sup>40</sup>. It has also been demonstrated that HBB is significantly downregulated in gastric  
274 cancer blood transcriptomics<sup>40</sup>. HSP90AA1 has also been demonstrated to be a potential biomarker for various  
275 cancers<sup>41</sup>, especially in the blood<sup>42</sup>.

276 The other interesting pathways are *DAPI2 signaling* pathway and *DAPI2 interactions* pathway revealed in  
277 both platelet and plasma datasets (**Fig. 6a, c**). DAPI2 triggers natural killer cell immune responses against certain  
278 tumor cells<sup>43</sup>, which is regulated by platelet<sup>44</sup>. Among the top 5 key genes of DAPI2 related pathway in both platelet  
279 and plasma datasets, B2M was reported as a serum protein encoding gene and a widely recognized tumor  
280 biomarker<sup>45</sup>; HLA-E and HLA-B were reported as cancer biomarkers in tissue and plasma<sup>46,47</sup>.

281 In addition, Pathformer provides insight into the interplay between various biological processes and their  
282 impact on cancer progression by updating pathway crosstalk network (**Fig. 6d-e**). In the plasma data, the link  
283 between *binding and uptake of ligands by scavenger receptors* pathway and *iron uptake and transport* pathway was  
284 a novel addition to the updated network (**Fig. 6d**). In other words, this crosstalk relationship was newly predicted  
285 by Pathformer. The crosstalk between two pathways was amplified by Pathformer in plasma dataset, probably  
286 because they were important for classification and shared the same key gene, FTH1, one of two intersecting genes  
287 between the two pathways. However, in platelet dataset, this crosstalk between two pathways was not shown, when  
288 the scavenger receptors pathway was not important enough (**Fig. 6e**). In summary, Pathformer's updated pathway  
289 crosstalk network visualizes the information flow between pathways related to cancer classification task in the liquid  
290 biopsy data, providing novel insight into the cross-talk of biological pathways in cancer patients' plasma.

## 291 **Discussion**

292 Pathformer utilizes a biological multi-modal embedding (**Fig. 1b**) based on pathway-based sparse neural network,  
293 providing a demonstration of applying Transformer model on biological multi-modal data integration. Particularly,  
294 we showed that the criss-cross attention mechanism (**Fig. 1c**) contributed to the classification tasks by capturing  
295 crosstalk between biological pathways and potential regulation between modalities (i.e., multi-omics).

296 ***Applications of Pathformer.*** Pathformer will be usefully in many clinical applications like cancer subtyping,  
297 staging, prognosis, and diagnosis. For instance, we have demonstrated excellent performance of Pathformer on  
298 noninvasive diagnosis of cancer based on multi-modal data of liquid biopsy. The accuracies (AUC scores) of cancer  
299 classification in plasma, EV, and platelet datasets were all higher than 90%. Furthermore, the interpretability of the  
300 Pathformer model can help researchers gain insights into the complex regulation processes involved in cancer. For  
301 instance, Pathformer has identified active pathways consistent with the characteristics of body fluid data, such as  
302 binding and uptake of ligands by scavenger receptors, and the DAP12 related pathway, which have been reported  
303 to be closely related to extracellular vesicle transport, platelet, and immune response during the development and  
304 progression of cancer.

305 ***Limitations of Pathformer and future directions.*** Pathformer used genes involved in pathways from four  
306 public databases, all of which consist of protein-coding genes. However, a substantial body of literature has reported  
307 that noncoding RNAs are also crucial in cancer prognosis and diagnosis<sup>48</sup>. Therefore, incorporating noncoding  
308 RNAs and their related functional pathways into Pathformer would be a potential future work. Another flaw of  
309 Pathformer is the computing memory issue. Pathway embedding of Pathformer has prevented memory overflow of  
310 Transformer module caused by long inputs. However, when adding more pathways or gene sets (e.g., transcription  
311 factors), Pathformer still faces the issue of memory overflow. In the future work, we may introduce linear attention  
312 to further improve computational speed.

313

## 314 **Methods**

### 315 **Data collection and preprocessing**

316 We collected 28 datasets across different cancer types from TCGA to evaluate classification performance of  
317 Pathformer and existing comparison methods, which consists of 8 datasets for cancer subtype classification, 10  
318 datasets for cancer early- and late- stage classification, and 10 datasets for cancer low- and high- survival risk  
319 classification. Besides, to further verify the effect of Pathformer in cancer diagnosis, we also collected three types  
320 of body fluid datasets: the plasma dataset (comprising 373 samples assayed by total cell-free RNA-seq<sup>49</sup>), the  
321 extracellular vesicle (EV) dataset (comprising 477 samples from two studies assayed by exosomal RNA-seq<sup>50,51</sup>),  
322 and the platelet dataset (comprising 918 sample from two studies assayed by tumor-educated blood platelet RNA-  
323 seq<sup>52,53</sup>). Through our biological information pipeline, totally 4 and 7 biological modalities are obtained for TCGA  
324 dataset and liquid biopsy dataset, respectively. More details of data collection and preprocessing are described in  
325 **Supplementary Fig. 1 and Supplementary Notes.**

### 326 **The Pathformer model**

327 As shown in **Fig. 1**, Pathformer consists of the following six modules: biological pathway input, pathway crosstalk  
328 network calculation, multi-modal data input, biological multi-modal embedding, Transformer module with pathway  
329 crosstalk network bias, and classification module.

#### 330 ***Biological pathways and crosstalk network***

331 We collected 2,289 pathways of four public databases including Kyoto Encyclopedia of Genes and Genomes  
332 database (KEGG)<sup>54</sup>, Pathway Interaction database (PID)<sup>55</sup>, Reactome database (Reactome)<sup>56</sup>, and BioCarta  
333 Pathways database (BioCarta)<sup>57</sup>. Then, we filtered these pathways by three criteria: gene number, the overlap ratio  
334 with other pathways (the proportion of genes in the pathway that are also present in other pathways), and the number  
335 of pathway subsets (the number of pathways included in the pathway). Following the principle of moderate size and  
336 minimal overlap with other pathway information, we selected 1,497 pathways with gene number between 15 and  
337 100, or gene number greater than 15 and overlap ratio less than 1, or gene number greater than 15 and the number  
338 of pathway subsets less than 5. Next, we used *BinoX* to calculate the crosstalk relationship of 1,497 pathways and  
339 build a pathway crosstalk network with adjacency matrix  $\mathbf{P} \in \mathbb{R}^{N_p \times N_p}$ ,  $N_p=1,497$  (more details in **Supplementary**  
340 **Notes**).

#### 341 ***Biological multi-modal data input and embedding***

342 Pathformer supports any number of modalities as input which may have different dimensions, including nucleotide  
343 level, fragment level, and gene level. For example, Pathformer's input for TCGA datasets includes gene-level RNA  
344 expression, fragment-level DNA methylation, and both fragment-level and gene-level DNA CNV. Pathformer's  
345 input for liquid biopsy datasets includes gene-level RNA expression; fragment-level RNA alternative promoter,  
346 RNA splicing, and chimeric RNA; and nucleotide-level RNA editing, RNA ASE, and RNA SNV. We represented  
347 multi-modal input matrix of a sample as  $\mathbf{M}$ , and converted matrix  $\mathbf{M}$  into gene encoding  $\mathbf{E}_G$  and pathway encoding  
348  $\mathbf{E}_P$ . First, we used a series of statistical indicators in different modalities as gene embedding. These statistical  
349 indicators include gene level score, count, entropy, minimum, maximum, mean, weighted mean in whole gene, and  
350 weighted mean in window. Gene embedding is calculated as follows:

$$351 \quad \mathbf{E}_G = \mathbf{F}_E(\mathbf{M}) = [f_{E_1}(\mathbf{G}_1), f_{E_2}(\mathbf{G}_2), \dots, f_{E_m}(\mathbf{G}_m)] \in \mathbb{R}^{N_g \times D_g}$$

352 , where  $\mathbf{G}_i$  is modality  $i$ ,  $D_g$  is length of gene embedding for all modalities,  $\mathbf{F}_E$  is a series of gene embedding  
353 functions.  $\mathbf{F}_E$  uses a series of statistical indicators to uniformly convert the data of different modalities into the gene  
354 level, and the embedding functions corresponding to different modalities are different (more details in  
355 **Supplementary Notes**). Then, we used the known biological pathways to construct a sparse neural network for  
356 converting the gene embedding  $\mathbf{E}_G$  into the pathway embedding  $\mathbf{E}_P$ , as described below:

$$357 \quad \mathbf{E}_P = \mathbf{W}_{sparse}^T \mathbf{E}_G + \mathbf{B}, \mathbf{E}_P \in \mathbb{R}^{N_p \times D_p}$$

358 , where  $N_p$  is the number of pathways,  $D_p = D_g$  is the length of pathway embedding,  $\mathbf{W}_{sparse} \in \mathbb{R}^{N_g \times N_p}$  is a  
359 learnable sparse weight matrix, and  $\mathbf{B}$  is a bias term.  $\mathbf{W}_{sparse}$  is constructed based on the known relationship  
360 between pathways and genes. When the given gene and the pathway are irrelevant, the corresponding element of  
361  $\mathbf{W}_{sparse}$  will always be 0. Otherwise, it needs to be learned through training.

### 362 *Transformer module with pathway crosstalk network bias*

363 We employed the Transformer module based on criss-cross attention with pathway crosstalk network bias, which  
364 has 3 blocks. Each block of Transformer module contains the following processes: multi-head column-wise self-  
365 attention (col-attention), multi-head row-wise self-attention (row-attention), layer normalization, GELU activation,  
366 residual connection, and network update. Multi-head column-wise self-attention contains 8 heads, each head is a  
367 mapping of  $\mathbf{Q}_1, \mathbf{K}_1, \mathbf{V}_1, \mathbf{P}$ , which are query vector, key vector, and value vector of multi-modal embedding and  
368 pathway crosstalk network matrix, respectively.

369 First, we represented the  $h$ th column-wise self-attention by  $\mathbf{A}_{col}^{(h)}$ , calculated as follows:

$$370 \quad \mathbf{A}_1^{(h)} = (\mathbf{Q}_1 \mathbf{K}_1^T) / \sqrt{d}$$

371 
$$\mathbf{A}_{col}^{(h)} = \text{dropout}_{0.2}(\text{softmax}(\mathbf{A}_1^{(h)} + \mathbf{P})) \cdot \mathbf{V}_1^{(h)}$$

372 , where  $h = 1, 2, \dots, H$  is the  $h$ th head;  $H$  is the number of heads;  $\mathbf{Q}_1 = \mathbf{E}_P \mathbf{W}_{Q_1}^{(h)}$ ,  $\mathbf{K}_1 = \mathbf{E}_P \mathbf{W}_{K_1}^{(h)}$ ,  $\mathbf{V}_1 = \mathbf{E}_P \mathbf{W}_{V_1}^{(h)}$  are  
 373 linear transformations of the input  $\mathbf{E}_P$ ;  $\mathbf{W}_{Q_1}^{(h)} \in \mathbb{R}^{D_p \times d}$ ,  $\mathbf{W}_{K_1}^{(h)} \in \mathbb{R}^{D_p \times d}$ ,  $\mathbf{W}_{V_1}^{(h)} \in \mathbb{R}^{D_p \times d}$  are the weight matrices as  
 374 parameters;  $d$  is the attention dimension;  $\text{dropout}_{0.2}$  is a dropout neural network layer with a probability of 0.2; and  
 375 softmax is the normalized exponential function.

376 Next, we merged multi-head column-wise self-attention and performed a series of operations as follows:

377 
$$\mathbf{g}_1^{(h)} = \text{sigmoid}(\mathbf{E}_P \mathbf{W}_{g_1}^{(h)})$$

378 
$$\mathbf{U}_1 = \sum_{h=1}^H (\mathbf{g}_1^{(h)} \circ \mathbf{A}_{col}^{(h)}) \cdot \mathbf{W}_{U_1}^{(h)}$$

379 
$$\mathbf{U}'_1 = \mathbf{U}_1 + \mathbf{E}_P$$

380 
$$\mathbf{O}_1 = \text{dropout}_{0.2}(\text{GELU}(\text{LayerNorm}(\mathbf{U}'_1) \cdot \mathbf{W}_{O_{11}})) \cdot \mathbf{W}_{O_{12}} + \mathbf{U}'_1$$

381 , where  $h = 1, 2, \dots, H$  is the  $h$ th head;  $H$  is the number of heads;  $\circ$  is the matrix dot product;  $\mathbf{W}_{g_1}^{(h)} \in \mathbb{R}^{D_p \times d}$ ,  $\mathbf{W}_{U_1}^{(h)} \in$   
 382  $\mathbb{R}^{d \times D_p}$ ,  $\mathbf{W}_{O_{11}} \in \mathbb{R}^{D_p \times o}$ ,  $\mathbf{W}_{O_{12}} \in \mathbb{R}^{o \times D_p}$  are the weight matrices as parameters;  $o$  is a constant; LayerNorm is the  
 383 layer normalization function; GELU is the distortion of RELU activation function; and  $\text{dropout}_{0.2}$  is a dropout  
 384 neural network layer with a probability of 0.2.

385 Multi-head row-wise self-attention enables information exchange between different modalities. It is a regular  
 386 dot-product attention without pathway crosstalk network bias. The  $h$ th row-wise self-attention, i.e.,  $\mathbf{A}_{row}^{(h)}$ , is  
 387 calculated as follows:

388 
$$\mathbf{A}_2^{(h)} = (\mathbf{Q}_2 \mathbf{K}_2^T) / \sqrt{d}$$

389 
$$\mathbf{A}_{row}^{(h)} = \text{dropout}_{0.2}(\text{softmax}(\mathbf{A}_2^{(h)})) \cdot \mathbf{V}_2^{(h)}$$

390 , where  $h = 1, 2, \dots, h$  is the  $h$ th head;  $H$  is the number of heads;  $\mathbf{Q}_2 = \mathbf{E}_P^T \mathbf{W}_{Q_2}^{(h)}$ ,  $\mathbf{K}_2 = \mathbf{E}_P^T \mathbf{W}_{K_2}^{(h)}$ ,  $\mathbf{V}_2 = \mathbf{E}_P^T \mathbf{W}_{V_2}^{(h)}$  are  
 391 linear transformations of the input  $\mathbf{E}_P^T$ ;  $\mathbf{W}_{Q_2}^{(h)} \in \mathbb{R}^{N_p \times d}$ ,  $\mathbf{W}_{K_2}^{(h)} \in \mathbb{R}^{N_p \times d}$ ,  $\mathbf{W}_{V_2}^{(h)} \in \mathbb{R}^{N_p \times d}$  are the weight matrices as  
 392 parameters;  $d$  is the attention dimension;  $\text{dropout}_{0.2}$  is a dropout neural network layer with a probability of 0.2; and  
 393 softmax is the normalized exponential function.

394 Subsequently, we merged multi-head row-wise self-attention and performed a series of operations. The  
 395 formulas are as follows:

396 
$$\mathbf{g}_2^{(h)} = \text{sigmoid}(\mathbf{E}_P^T \mathbf{W}_{g_2}^{(h)})$$

$$U_2 = \sum_{h=1}^H (g_2^{(h)} \circ A_{row}^{(h)}) \cdot W_{U_2}^{(h)}$$

$$U'_2 = \beta * U_2 + E_p^T$$

$$O_2 = dropout_{0.2}(\text{GELU}(\text{LayerNorm}(U'_2) \cdot W_{O_{21}})) \cdot W_{O_{22}} + U'_2$$

397  
398  
399  
400 , where  $h = 1, 2, \dots, h$  is the  $h$ th head;  $H$  is the number of heads;  $\circ$  is the matrix dot product;  $W_{g_2}^{(h)} \in \mathbb{R}^{N_p \times d}$ ,  $W_{U_2}^{(h)} \in$   
401  $\mathbb{R}^{d \times N_p}$ ,  $W_{O_{21}} \in \mathbb{R}^{N_p \times o}$ ,  $W_{O_{22}} \in \mathbb{R}^{o \times N_p}$  are the weight matrices as parameters;  $o$  is a constant;  $\beta$  is a constant  
402 coefficient for row-attention; LayerNorm is the layer normalization function; GELU is the distortion of RELU  
403 activation function; and  $dropout_{0.2}$  is a dropout neural network layer with a probability of 0.2.  $O_2$  is pathway  
404 embedding input of the next Transformer block. In other words, when  $E_p$  is  $E_p^{(0)}$ ,  $O_2$  is  $E_p^{(1)}$ , superscripts with  
405 parenthesis represent data at different block.

406 Then, we used the updated pathway embedding  $O_2$  to update the pathway crosstalk network. We exploited the  
407 correlation between embedding vectors of two pathways to update the corresponding element of the pathway  
408 crosstalk network matrix. The formula is as follows:

$$P' = (P \cdot P^T) / N_p$$

409  
410 , where  $P'$  is the updated pathway crosstalk network matrix of next Transformer block. In other words, when  $P'$  is  
411  $P^{(1)}$ ,  $P$  is  $P^{(0)}$ , superscripts with parenthesis represent data at different block.

## 412 **Classification module**

413 In order to solve the classification tasks, we used the fully connected neural network as the classification module to  
414 transform pathway embedding encoded by the Transformer module into the probability for each label. Three fully  
415 connected neural networks each have 300, 200, and 100 neurons, with dropout probability  $dropout_c$ , which is  
416 hyperparameter. More details of the classification module are described in **Supplementary Notes**.

## 417 **Model training and test**

418 In this study, we implemented Pathformer's network architecture using the "PyTorch" package in *Python* v3.6.9,  
419 and our codes can be found in the GitHub repository (<https://github.com/lulab/Pathformer>). For model training and  
420 test, we divided the labeled dataset into the discovery set (75%) and the validation set (25%) hierarchically. We  
421 implemented model training, hyperparameter optimization and model early stopping on the discovery set and tested  
422 on the validation set (**Supplementary Fig. 1**).

423 When training the model, we used a normal model learning strategy. We applied cross-entropy loss with class-



424 imbalance weight as the label prediction loss, the ADAM optimizer to train Pathformer, and the cosine annealing  
425 learning rate method to optimized learning rate. For hyperparameter optimization, we used grid search with 5-fold  
426 cross-validation in the discovery set. We used the macro-averaged F1 score as the selection criterion to find the  
427 optimal combination of maximum of learning rate $\in[1e-4, 1e-5]$ , dropout probability of classification ( $c$ ) $\in[0.3, 0.5]$ ,  
428 and constant coefficient for row-attention ( $\beta$ ) $\in[0.1, 1]$ . For early stopping, we divided the discovery set into the  
429 training set (75%) and the test set (25%) hierarchically, and used the macro-averaged F1 score of the test set as the  
430 criterion for stopping training. When testing the model, we used the best model trained with optimal hyperparametric  
431 combination in the validation set. More details of model training and test are described in **Supplementary Notes**.

### 432 **Model interpretability**

433 To better understand Pathformer's decisions, we increased the interpretability of Pathformer by calculating  
434 contributions of different modalities, important pathways and their key genes, and hub module of the updated  
435 pathway crosstalk network.

#### 436 ***Contribution of each modality***

437 In Pathformer, row-attention is used to facilitate information interaction between different modalities, that is, row-  
438 attention map can represent the importance of each modality. According to the trained model, we obtained row-  
439 attention maps of 8 heads in 3 blocks for each sample. For the contribution of each modality, we first integrated all  
440 matrices of row-attention maps into one matrix by element-wise average. Then, we averaged this average row-  
441 attention matrix along with columns as the attention weights of modalities, i.e., the contribution of modalities. The  
442 calculation is as follows:

$$443 \mathbf{A}_{aver} = \frac{1}{N} \sum_{n=1}^N \frac{1}{BL} \sum_{b=1}^{BL} \frac{1}{H} \sum_{h=1}^H softmax([\mathbf{A}_2^{(h)}]^{(b)})^{(n)}$$

$$444 attention\ weight_i = \frac{1}{D_p} \sum_{j=1}^{D_p} a_{ij}, a_{ij} \text{ is the } i\text{th row and the } j\text{th columns of } \mathbf{A}_{aver}$$

445 , where  $N$  is the number of samples,  $BL$  is the number of blocks,  $H$  is the number of heads, softmax is a normalized  
446 exponential function, and  $attention\ weight_i$  is the attention weight of dimension  $i$  of pathway embedding.

#### 447 ***Important pathways and their key genes***

448 SHapley Additive exPlanations<sup>21</sup> (SHAP) is an additive explanation model inspired by coalitional game theory,  
449 which regards all features as "contributors". SHAP value is the value assigned to each feature, which explains the  
450 relationship between pathways, genes and classification, implemented by "SHAP" package of *Python* v3.6.9.

451 Specifically, we calculated SHAP values of the gene embedding and the pathway embedding encoded by

452 Transformer module corresponding to each sample and each category, denoted as  $\mathbf{S}_{gn}^{(j)} \in \mathbb{R}^{D_p}$  and  $\mathbf{S}_{pn}^{(j)} \in \mathbb{R}^{D_p}$   
453 respectively. The SHAP values of genes and pathways are calculated as follows:

$$454 \quad \text{SHAP}_g = \sum_{j=1}^{d_{out}} \sum_{e=1}^{D_p} \frac{1}{N} \sum_{n=1}^N |s_{gne}^{(j)}|, s_{gie}^{(j)} \in \mathbf{S}_{gi}^{(j)}$$

$$455 \quad \text{SHAP}_p = \sum_{j=1}^{d_{out}} \sum_{e=1}^{D_p} \frac{1}{N} \sum_{n=1}^N |s_{pne}^{(j)}|, s_{pie}^{(j)} \in \mathbf{S}_{pi}^{(j)}$$

456 , where  $g = 1, 2, \dots, N_g$  is the  $g$ th gene,  $p = 1, 2, \dots, N_p$  is the  $p$ th pathway,  $n = 1, 2, \dots, N$  is the  $n$ th sample,  $e =$   
457  $1, 2, \dots, D_p$  is dimension  $e$  of pathway embedding, and  $j = 1, 2, \dots, d_{out}$  is the  $j$ th category of sample.

458 In addition, we calculated SHAP values of pathways and genes in different modalities, described as follows:

$$459 \quad \text{SHAP}_{gi} = \sum_{j=1}^{d_{out}} \sum_{e=e_1+\dots+e_{i-1}}^{e_i} \frac{1}{N} \sum_{n=1}^N |s_{gne}^{(j)}|, s_{gie}^{(j)} \in \mathbf{S}_{gi}^{(j)}$$

$$460 \quad \text{SHAP}_{pi} = \sum_{j=1}^{d_{out}} \sum_{e=e_1+\dots+e_{i-1}}^{e_i} \frac{1}{N} \sum_{n=1}^N |s_{pne}^{(j)}|, s_{pie}^{(j)} \in \mathbf{S}_{pi}^{(j)}$$

461 , where  $i = 1, \dots, m$  is the  $i$ th modality,  $e_i$  is the length of gene embedding and pathway embedding for modality  $i$ .

462 Finally, pathways with the top 15 SHAP values in the classification task are considered as important pathways.  
463 For each pathway, genes with top 5 SHAP values are considered as the key genes of the pathway. The core modality  
464 on which one gene depends indicates that the SHAP value of that gene ranks higher on this modality than on the  
465 others.

#### 466 ***Hub module of the updated pathway crosstalk network***

467 In Pathformer, pathway crosstalk network matrix is used to guide the direction of information flow, and updated  
468 according to encoded pathway embedding in each Transformer block. Therefore, the updated pathway crosstalk  
469 network contains not only prior information but also multi-modal data information, which represents the specific  
470 regulatory mechanism in each classification task. We defined the sub-network score through SHAP value of each  
471 pathway in sub-network, so as to find foremost sub-network for prediction, that is, hub module of the updated  
472 pathway crosstalk network. The calculation of the sub-network score can be divided into four steps: average pathway  
473 crosstalk network matrix calculation, network pruning, sub-network boundary determination, and score calculation.  
474 More details of sub-network score calculations are described in **Supplementary Notes**.

475

## 476 **Declarations**

### 477 **Data availability**

478 All datasets used in this study are publicly available for academic research usages. The details of usage are also  
479 fully illustrated in Methods and Supplementary Notes.

### 480 **Code availability**

481 Source code for data preprocessing and model training is freely available at Github  
482 (<https://github.com/lulab/Pathformer>) with detailed instructions. Source code for comparing the other methods is  
483 also included.

### 484 **Consent for publication**

485 All authors have approved the manuscript and agree with the publication.

### 486 **Competing interests**

487 The authors declare that they have no competing interests.

### 488 **Funding and Acknowledgements**

489 This work is supported by National Natural Science Foundation of China (81972798, 32170671), Tsinghua  
490 University Spring Breeze Fund (2021Z99CFY022), National Key Research Program of China (2021YFA1301603),  
491 Tsinghua University Guoqiang Institute Grant (2021GQG1020), Tsinghua University Initiative Scientific Research  
492 Program of Precision Medicine (2022ZLA003), Bioinformatics Platform of National Center for Protein Sciences  
493 (Beijing) (2021-NCPSB-005). This study was also supported by Bayer Micro-funding, Beijing Advanced  
494 Innovation Center for Structural Biology, Bio-Computing Platform of Tsinghua University Branch of China  
495 National Center for Protein Sciences. We also thank Hongli Ma and Kexing Li for helping us edit the text of  
496 manuscript.

497 *Funding for open access charge: Tsinghua University Guoqiang Institute Grant (2021GQG1020).*

498

## 499 References

- 500 1 Hasin, Y., Seldin, M. & Lusis, A. Multi-omics approaches to disease. *Genome biology* **18**, 1-  
501 15 (2017).
- 502 2 Tarazona, S., Arzalluz-Luque, A. & Conesa, A. Undisclosed, unmet and neglected challenges  
503 in multi-omics studies. *Nature Computational Science* **1**, 395-402 (2021).
- 504 3 Shen, R., Olshen, A. B. & Ladanyi, M. Integrative clustering of multiple genomic data types  
505 using a joint latent variable model with application to breast and lung cancer subtype analysis.  
506 *Bioinformatics* **25**, 2906-2912 (2009).
- 507 4 Lando, M. *et al.* Gene dosage, expression, and ontology analysis identifies driver genes in the  
508 carcinogenesis and chemoradioresistance of cervical cancer. *PLoS genetics* **5**, e1000719  
509 (2009).
- 510 5 Cabassi, A. & Kirk, P. D. Multiple kernel learning for integrative consensus clustering of  
511 omic datasets. *Bioinformatics* **36**, 4789-4796 (2020).
- 512 6 Wang, T. *et al.* MOGONET integrates multi-omics data using graph convolutional networks  
513 allowing patient classification and biomarker identification. *Nature Communications* **12**, 1-  
514 13 (2021).
- 515 7 Wang, B. *et al.* Similarity network fusion for aggregating data types on a genomic scale.  
516 *Nature methods* **11**, 333-337 (2014).
- 517 8 Lock, E. F., Hoadley, K. A., Marron, J. S. & Nobel, A. B. Joint and individual variation  
518 explained (JIVE) for integrated analysis of multiple data types. *The annals of applied statistics*  
519 **7**, 523 (2013).
- 520 9 Rohart, F., Gautier, B., Singh, A. & Lê Cao, K.-A. mixOmics: An R package for ‘omics  
521 feature selection and multiple data integration. *PLoS computational biology* **13**, e1005752  
522 (2017).
- 523 10 Wang, T. *et al.* MOGONET integrates multi-omics data using graph convolutional networks  
524 allowing patient classification and biomarker identification. *Nat Commun* **12**, 3445,  
525 doi:10.1038/s41467-021-23774-w (2021).
- 526 11 Moon, S. & Lee, H. MOMA: A Multi-Task Attention Learning Algorithm for Multi-Omics  
527 Data Interpretation and Classification. *Bioinformatics*, doi:10.1093/bioinformatics/btac080  
528 (2022).
- 529 12 Ma, J. *et al.* Using deep learning to model the hierarchical structure and function of a cell.  
530 *Nature methods* **15**, 290-298 (2018).
- 531 13 Hao, J., Kim, Y., Kim, T. K. & Kang, M. PASNet: pathway-associated sparse deep neural  
532 network for prognosis prediction from high-throughput data. *BMC Bioinformatics* **19**, 510,  
533 doi:10.1186/s12859-018-2500-z (2018).
- 534 14 Elmarakeby, H. A. *et al.* Biologically informed deep neural network for prostate cancer  
535 discovery. *Nature* **598**, 348-352 (2021).
- 536 15 Oh, J. H. *et al.* PathCNN: interpretable convolutional neural networks for survival prediction  
537 and pathway analysis applied to glioblastoma. *Bioinformatics* **37**, i443-i450,  
538 doi:10.1093/bioinformatics/btab285 (2021).
- 539 16 Li, Y., Agarwal, P. & Rajagopalan, D. A global pathway crosstalk network. *Bioinformatics*  
540 **24**, 1442-1447 (2008).
- 541 17 Hu, R. & Singh, A. in *Proceedings of the IEEE/CVF International Conference on Computer*  
542 *Vision*. 1439-1449.
- 543 18 Cancer Genome Atlas Research Network, J. The cancer genome atlas pan-cancer analysis  
544 project. *Nat. Genet* **45**, 1113-1120 (2013).
- 545 19 Ogris, C., Guala, D., Helleday, T. & Sonnhammer, E. L. A novel method for crosstalk analysis  
546 of biological networks: improving accuracy of pathway annotation. *Nucleic acids research*  
547 **45**, e8-e8 (2017).
- 548 20 Jumper, J. *et al.* Highly accurate protein structure prediction with AlphaFold. *Nature* **596**,  
549 583-589 (2021).

- 550 21 Lundberg, S. M. & Lee, S.-I. A unified approach to interpreting model predictions. *Advances*  
551 *in neural information processing systems* **30** (2017).
- 552 22 Parker, J. S. *et al.* Supervised risk predictor of breast cancer based on intrinsic subtypes.  
553 *Journal of clinical oncology* **27**, 1160 (2009).
- 554 23 Urra, F. A., Muñoz, F., Lovy, A. & Cárdenas, C. The mitochondrial complex (I) ty of cancer.  
555 *Frontiers in oncology* **7**, 118 (2017).
- 556 24 Kopinski, P. K., Singh, L. N., Zhang, S., Lott, M. T. & Wallace, D. C. Mitochondrial DNA  
557 variation and cancer. *Nature Reviews Cancer* **21**, 431-445 (2021).
- 558 25 Silwal-Pandit, L. *et al.* TP53 Mutation Spectrum in Breast Cancer Is Subtype Specific and  
559 Has Distinct Prognostic RelevanceTP53 in Breast Cancer. *Clinical Cancer Research* **20**,  
560 3569-3580 (2014).
- 561 26 Sundvall, M. *et al.* Role of ErbB4 in breast cancer. *Journal of mammary gland biology and*  
562 *neoplasia* **13**, 259-268 (2008).
- 563 27 Ribeiro, E. *et al.* Triple negative breast cancers have a reduced expression of DNA repair  
564 genes. *PLoS One* **8**, e66243 (2013).
- 565 28 Srihari, S. *et al.* Understanding the functional impact of copy number alterations in breast  
566 cancer using a network modeling approach. *Molecular BioSystems* **12**, 963-972 (2016).
- 567 29 Oshi, M. *et al.* The E2F pathway score as a predictive biomarker of response to neoadjuvant  
568 therapy in ER+/HER2- breast cancer. *Cells* **9**, 1643 (2020).
- 569 30 Rocca, M. S. *et al.* E2F1 copy number variations in germline and breast cancer: a retrospective  
570 study of 222 Italian women. *Molecular Medicine* **27**, 1-7 (2021).
- 571 31 Guo, Q. *et al.* Expression of HDAC1 and RBBP4 correlate with clinicopathologic  
572 characteristics and prognosis in breast cancer. *International journal of clinical and*  
573 *experimental pathology* **13**, 563 (2020).
- 574 32 Marques, O., da Silva, B. M., Porto, G. & Lopes, C. Iron homeostasis in breast cancer. *Cancer*  
575 *letters* **347**, 1-14 (2014).
- 576 33 So, C. L., Saunus, J. M., Roberts-Thomson, S. J. & Monteith, G. R. in *Seminars in cell &*  
577 *developmental biology*. 74-83 (Elsevier).
- 578 34 Schwarzenbach, H., Hoon, D. S. & Pantel, K. Cell-free nucleic acids as biomarkers in cancer  
579 patients. *Nature Reviews Cancer* **11**, 426-437 (2011).
- 580 35 Vorperian, S. K. *et al.* Cell types of origin of the cell-free transcriptome. *Nature biotechnology*  
581 **40**, 855-861 (2022).
- 582 36 Ryu, S., Howland, A., Song, B., Youn, C. & Song, P. I. Scavenger receptor class A to E  
583 involved in various cancers. *Chonnam medical journal* **56**, 1-5 (2020).
- 584 37 Kzhyshkowska, J., Gratchev, A. & Goerdt, S. Stabilin - 1, a homeostatic scavenger receptor  
585 with multiple functions. *Journal of cellular and molecular medicine* **10**, 635-649 (2006).
- 586 38 Onda, M. *et al.* Decreased expression of haemoglobin beta (HBB) gene in anaplastic thyroid  
587 cancer and recovery of its expression inhibits cell growth. *British Journal of Cancer* **92**, 2216-  
588 2224 (2005).
- 589 39 Ponzetti, M. *et al.* Non-conventional role of haemoglobin beta in breast malignancy. *British*  
590 *journal of cancer* **117**, 994-1006 (2017).
- 591 40 Lee, I.-S. *et al.* A blood-based transcriptomic signature for noninvasive diagnosis of gastric  
592 cancer. *British Journal of Cancer* **125**, 846-853 (2021).
- 593 41 Zuehlke, A. D., Beebe, K., Neckers, L. & Prince, T. Regulation and function of the human  
594 HSP90AA1 gene. *Gene* **570**, 8-16 (2015).
- 595 42 Zhang, P. j. *et al.* Genes expression profiling of peripheral blood cells of patients with  
596 hepatocellular carcinoma. *Cell biology international* **36**, 803-809 (2012).
- 597 43 Campbell, K. S. & Colonna, M. DAP12: a key accessory protein for relaying signals by  
598 natural killer cell receptors. *The international journal of biochemistry & cell biology* **31**, 631-  
599 636 (1999).
- 600 44 Placke, T., Kopp, H.-G. & Salih, H. R. Modulation of natural killer cell anti-tumor reactivity  
601 by platelets. *Journal of innate immunity* **3**, 374-382 (2011).

- 602 45 Cooper, E. & Plesner, T. Beta - 2 - microglobulin review: Its relevance in clinical oncology.  
603 *Medical and Pediatric Oncology* **8**, 323-334 (1980).
- 604 46 Zeestraten, E. *et al.* Combined analysis of HLA class I, HLA-E and HLA-G predicts prognosis  
605 in colon cancer patients. *British journal of cancer* **110**, 459-468 (2014).
- 606 47 Liu, L. *et al.* A three-platelet mRNA set: MAX, MTURN and HLA-B as biomarker for lung  
607 cancer. *Journal of Cancer Research and Clinical Oncology* **145**, 2713-2723 (2019).
- 608 48 Qi, P., Zhou, X.-y. & Du, X. Circulating long non-coding RNAs in cancer: current status and  
609 future perspectives. *Molecular cancer* **15**, 1-11 (2016).
- 610 49 Chen, S. *et al.* Cancer type classification using plasma cell-free RNAs derived from human  
611 and microbes. *eLife* **11**, e75181 (2022).
- 612 50 Li, S. *et al.* exoRBase: a database of circRNA, lncRNA and mRNA in human blood exosomes.  
613 *Nucleic acids research* **46**, D106-D112 (2018).
- 614 51 Yu, S. *et al.* Plasma extracellular vesicle long RNA profiling identifies a diagnostic signature  
615 for the detection of pancreatic ductal adenocarcinoma. *Gut* **69**, 540-550 (2020).
- 616 52 Best, M. G. *et al.* RNA-Seq of tumor-educated platelets enables blood-based pan-cancer,  
617 multiclass, and molecular pathway cancer diagnostics. *Cancer cell* **28**, 666-676 (2015).
- 618 53 Best, M. G. *et al.* Swarm intelligence-enhanced detection of non-small-cell lung cancer using  
619 tumor-educated platelets. *Cancer cell* **32**, 238-252. e239 (2017).
- 620 54 Kanehisa, M. & Goto, S. KEGG: kyoto encyclopedia of genes and genomes. *Nucleic acids*  
621 *research* **28**, 27-30 (2000).
- 622 55 Schaefer, C. F. *et al.* PID: the pathway interaction database. *Nucleic acids research* **37**, D674-  
623 D679 (2009).
- 624 56 Croft, D. *et al.* Reactome: a database of reactions, pathways and biological processes. *Nucleic*  
625 *acids research* **39**, D691-D697 (2010).
- 626 57 Nishimura, D. BioCarta. *Biotech Software & Internet Report: The Computer Software Journal*  
627 *for Scient* **2**, 117-120 (2001).
- 628



## 629 **Figure Legends**

630

### 631 **Figure 1. Overview of the Pathformer model.**

632 **a.** Model architecture of Pathformer.  $F_E$ , statistical indicators in the gene embedding. **b.** Calculation of biological  
633 multi-modal embedding. Circles, neurons in the neural network; arrows, represent the direction of information flow;  
634 G, gene; P, pathway; W, weight of pathway-based sparse neural network. The weights of the pathway-based sparse  
635 neural network represent the importance of different genes in different pathways. **c.** A block of Transformer module  
636 with pathway crosstalk network bias (3 blocks used in **a**). The pathway embedding matrix is used as input and the  
637 pathway crosstalk network matrix is used as bias.  $N_p$ , number of pathways;  $D_p$ , dimensionality of pathway  
638 embedding;  $h$ , number of attention heads;  $d$ , attention dimension;  $V_1, K_1, Q_1, A_1$ : vale, key, query and attention  
639 map of col-attention;  $V_2, K_2, Q_2, A_2$ : vale, key, query and attention map of row-attention; +, element-wise addition;  
640  $\times$ , matrix multiplication;  $\circ$ , matrix dot product;  $\beta$ , constant coefficient for row-attention.

641

### 642 **Figure 2. Performance comparison between Pathformer and other multi-modal integration methods**

643 Bar charts show the macro-averaged F1 score of different multi-modal integration methods in different classification  
644 tasks of TCGA datasets. Error bars are from 2 times 5-fold cross-validation, representing 95% confidence intervals.  
645 XGBoost refers to the early integration methods based on gradient boosted tree, while XGBoost (late) refers to the  
646 late integration methods based on gradient boosted tree.

647

### 648 **Figure 3. Ablation analysis of Pathformer for the classification of early- and late-stage cancer patients.**

649 **a.** Different types of data (modalities) were used as input for TCGA cancer early- and late-stage classification. **b.**  
650 Ablation analysis of different modules in Pathformer. Error bars are from 2 times 5-fold cross-validation across 8  
651 datasets, representing 95% confidence intervals. CC-attention, Pathformer without pathway crosstalk network bias;  
652 Transformer, Pathformer without either pathway crosstalk network bias or row-attention; PSNN, Pathformer  
653 without Transformer module; NN, classification module only.

654

### 655 **Figure 4. Breast cancer subtype related modalities, pathways and genes revealed by Pathformer.**

656 **a.** Contributions of different modalities for breast cancer (BRCA) subtype classification calculated by attention  
657 weights (averaging attention maps of row-attention). **b.** Important pathways and their key genes with top SHapley  
658 Additive exPlanations (SHAP) values. Among the key genes, different colors represent different pillar modalities



659 of the genes. **c.** A hub module of pathway crosstalk network for BRCA subtype classification. Color depth and size  
660 of node represents the degree of node. Line thickness represents the weight of edge. All links are predicted by  
661 Pathformer, where known links are reported by the initial crosstalk network and new links are new predictions.

662

663 **Figure 5. Pathformer integrates multi-modal liquid biopsy data for non-invasive cancer diagnosis.**

664 **a.** Contributions of different input features and their statistical indicators when classifying cancer patients from  
665 healthy controls using three liquid biopsy datasets. All mean represents the sum of mean, weighted mean and  
666 window weighted mean. Each type of RNA splicing is the sum of all statistical indicators in this type. **b.**  
667 Classification performance of different input combinations. Each value is the mean of 5-fold cross-validation.

668

669 **Figure 6. Interpretation of the liquid biopsy data using Pathformer.**

670 Important pathways and their key genes revealed by Pathformer in the datasets of **(a)** plasma **(b)** EV **(c)** platelet  
671 when classifying cancer patients from healthy controls. The pathways and their key genes were selected with top  
672 SHAP values. Among the key genes, different colors represent different pillar modalities (e.g., RNA expression,  
673 RNA editing, etc) of the genes. Hub modules of pathway crosstalk network are shown for **(d)** plasma and **(e)** platelet  
674 data. Color depth and size of node represent the degree of node. Line thickness represents the weight of edge. All  
675 links are predicted by Pathformer, where known links are reported by the initial crosstalk network and new links  
676 are new predictions.

677

Figure 1. Overview of the Pathformer model.

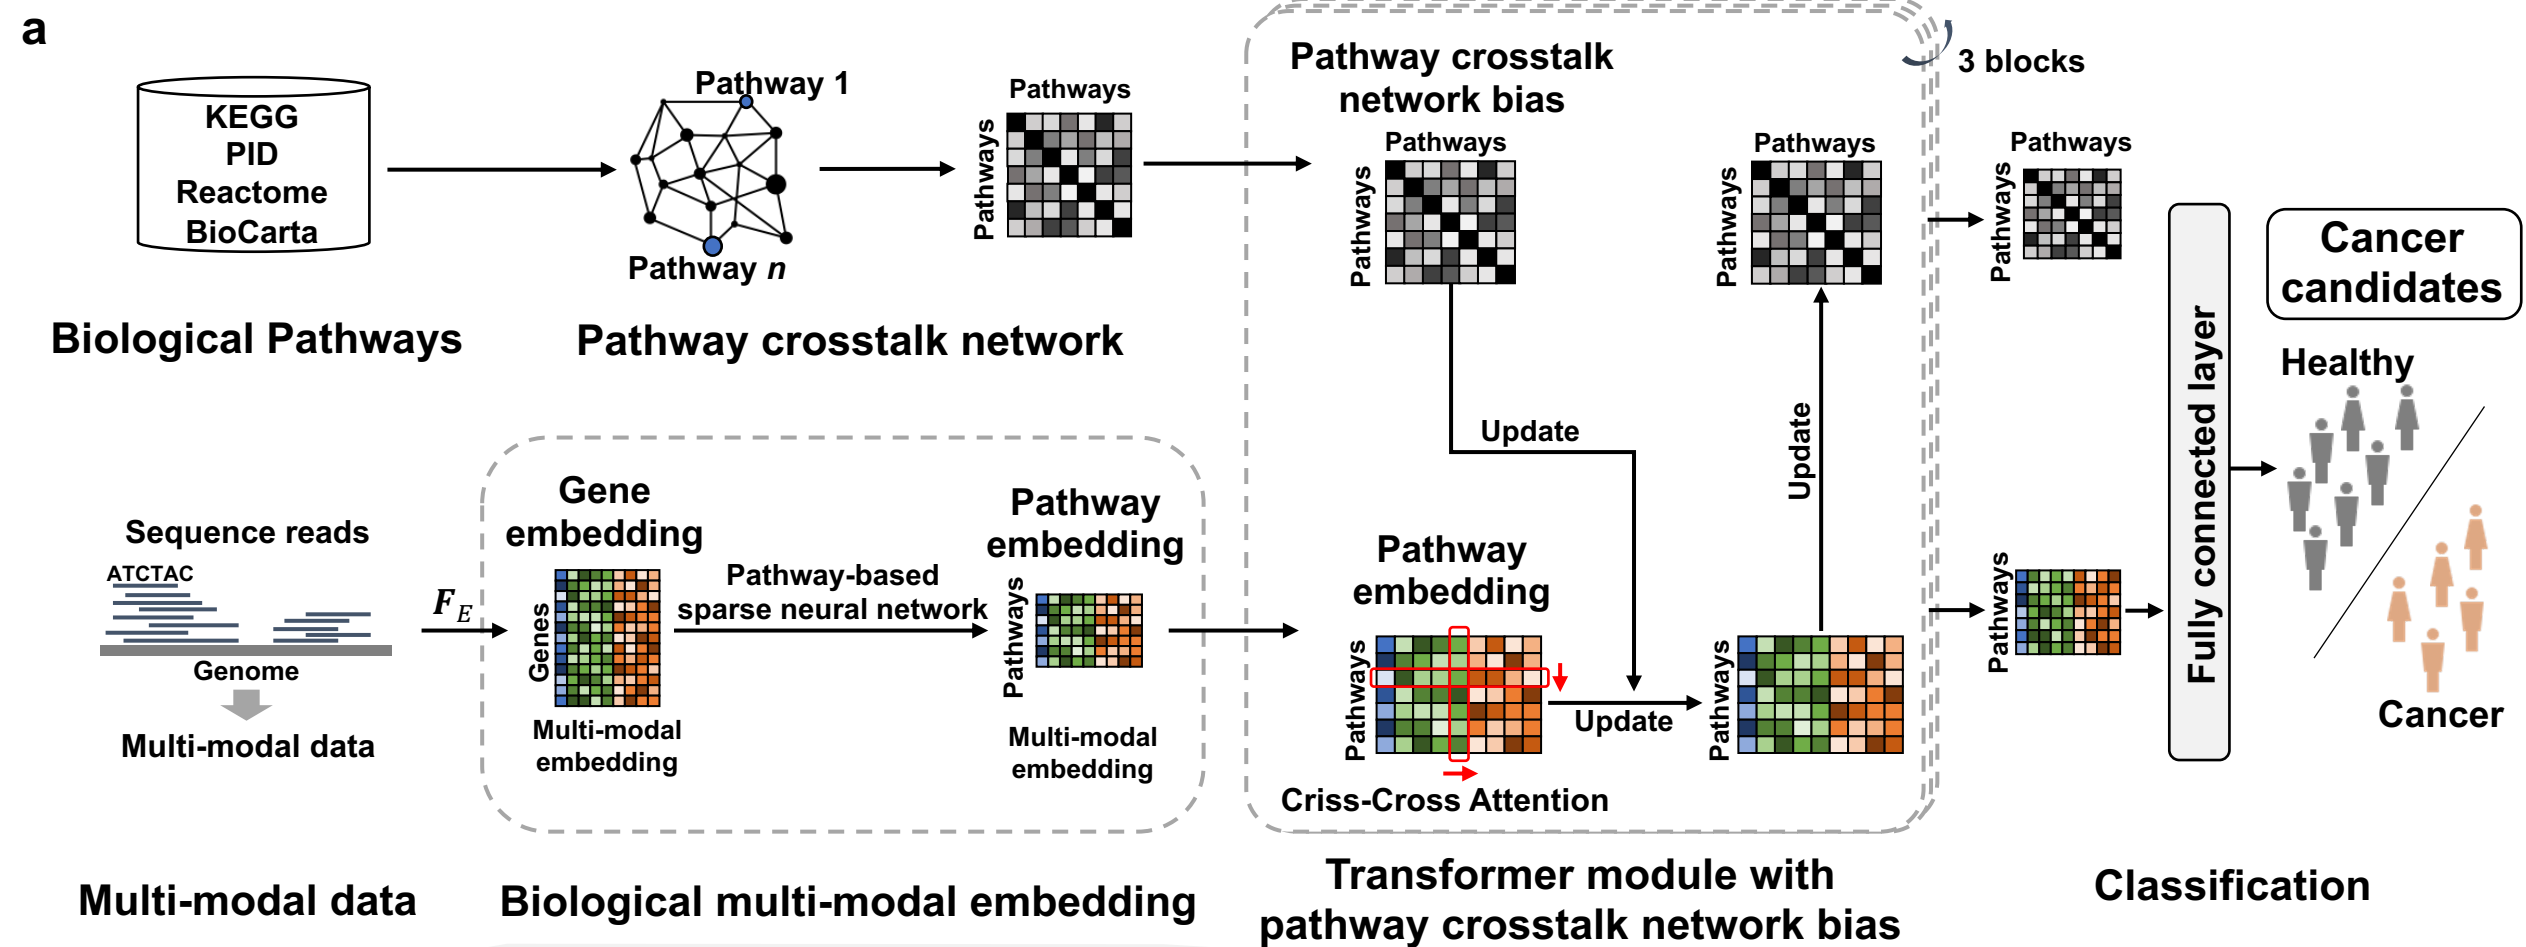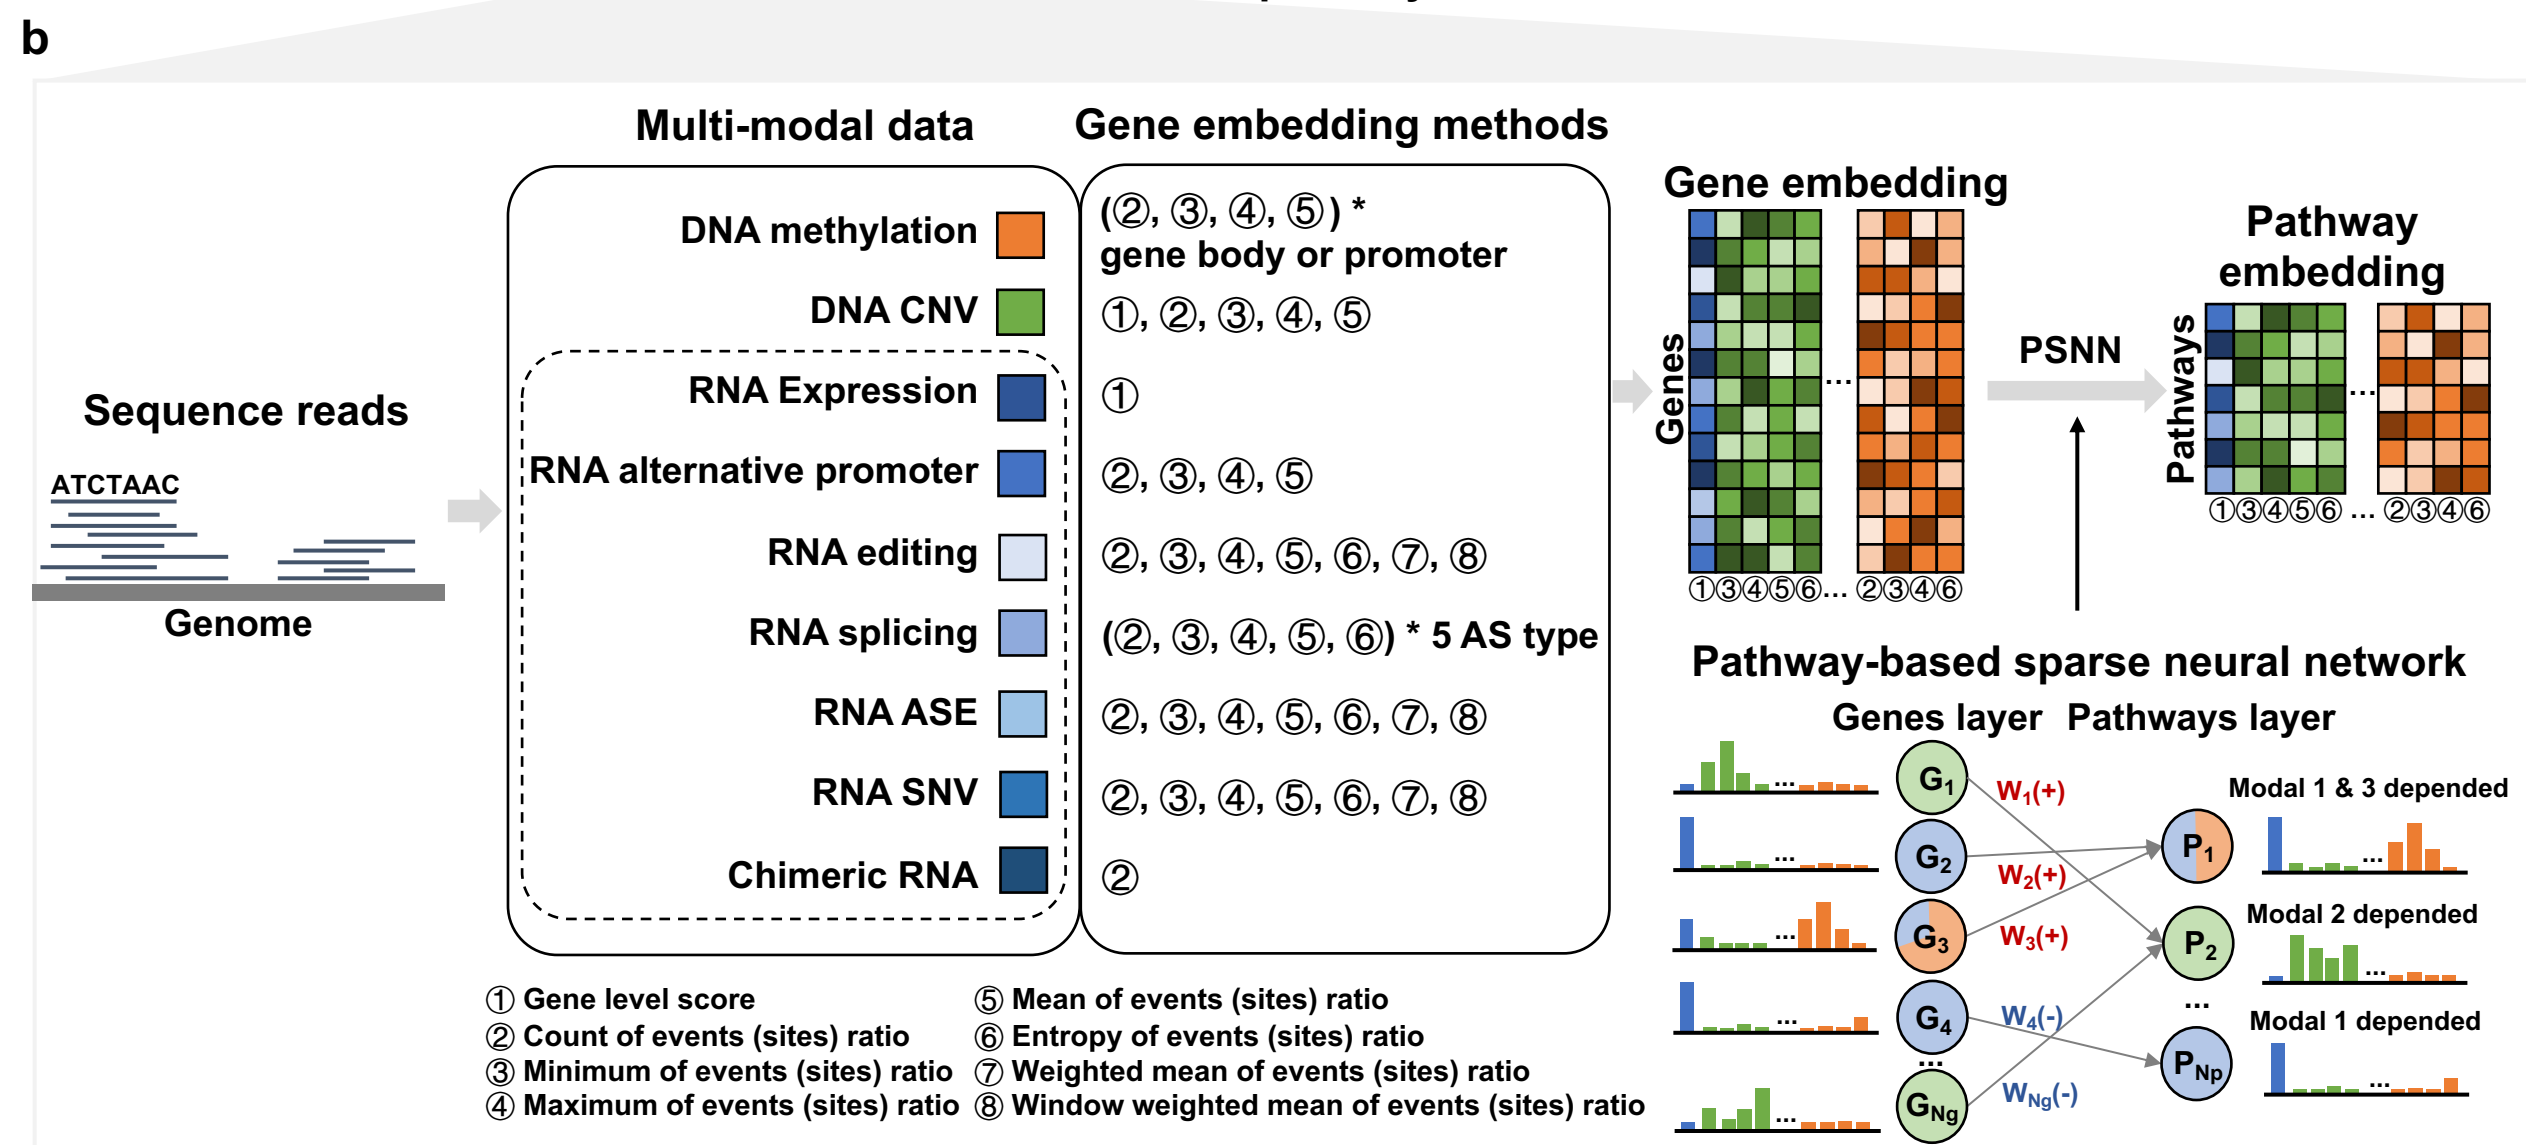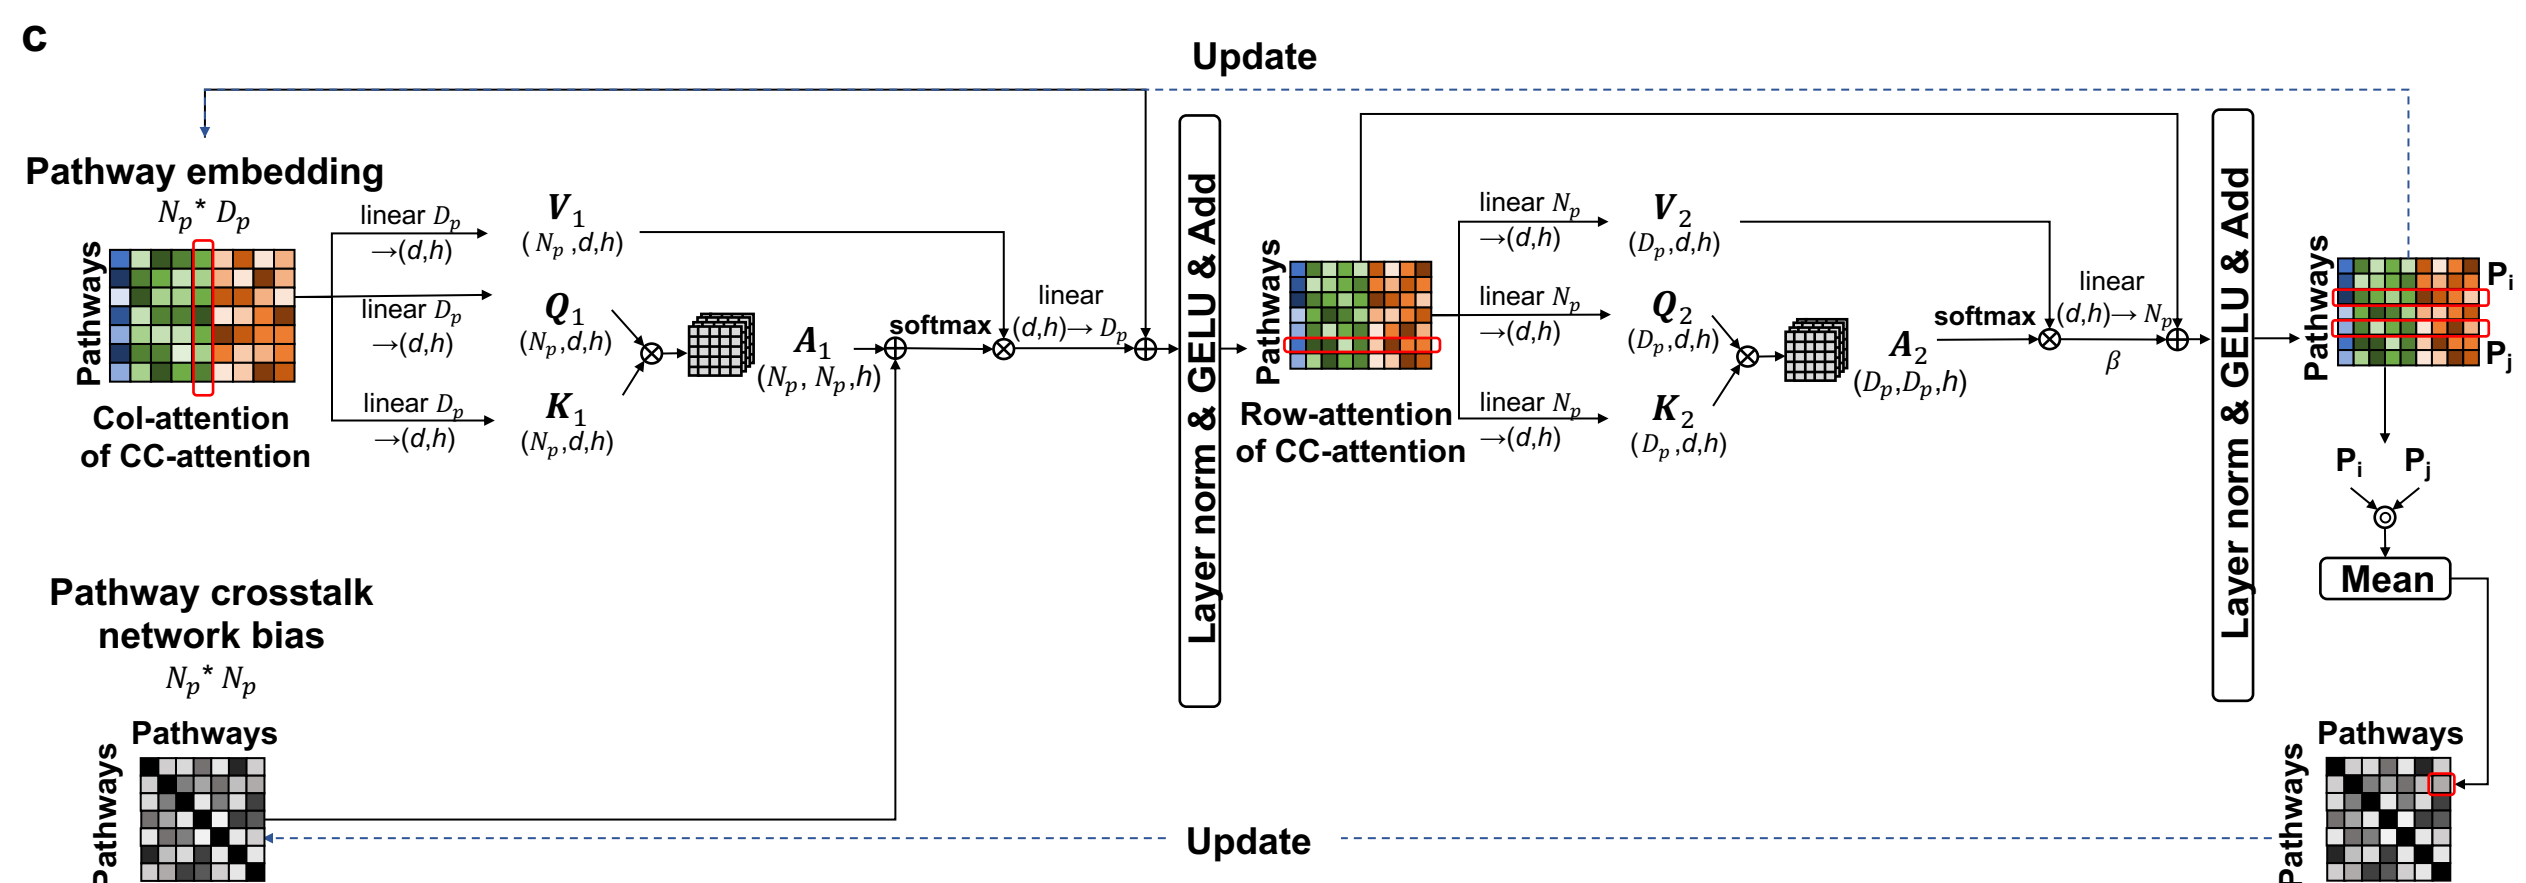

Figure 2. Performance comparison between Pathformer and other multi-modal integration methods

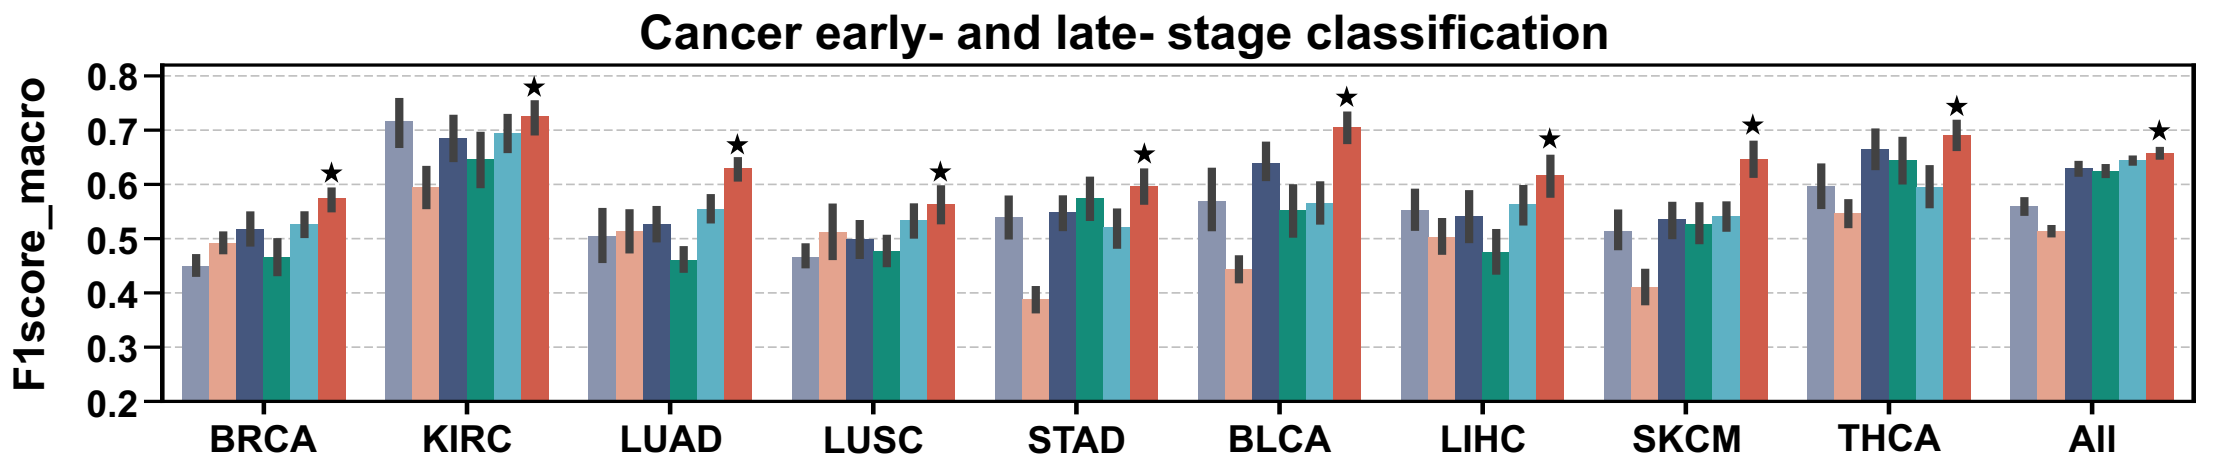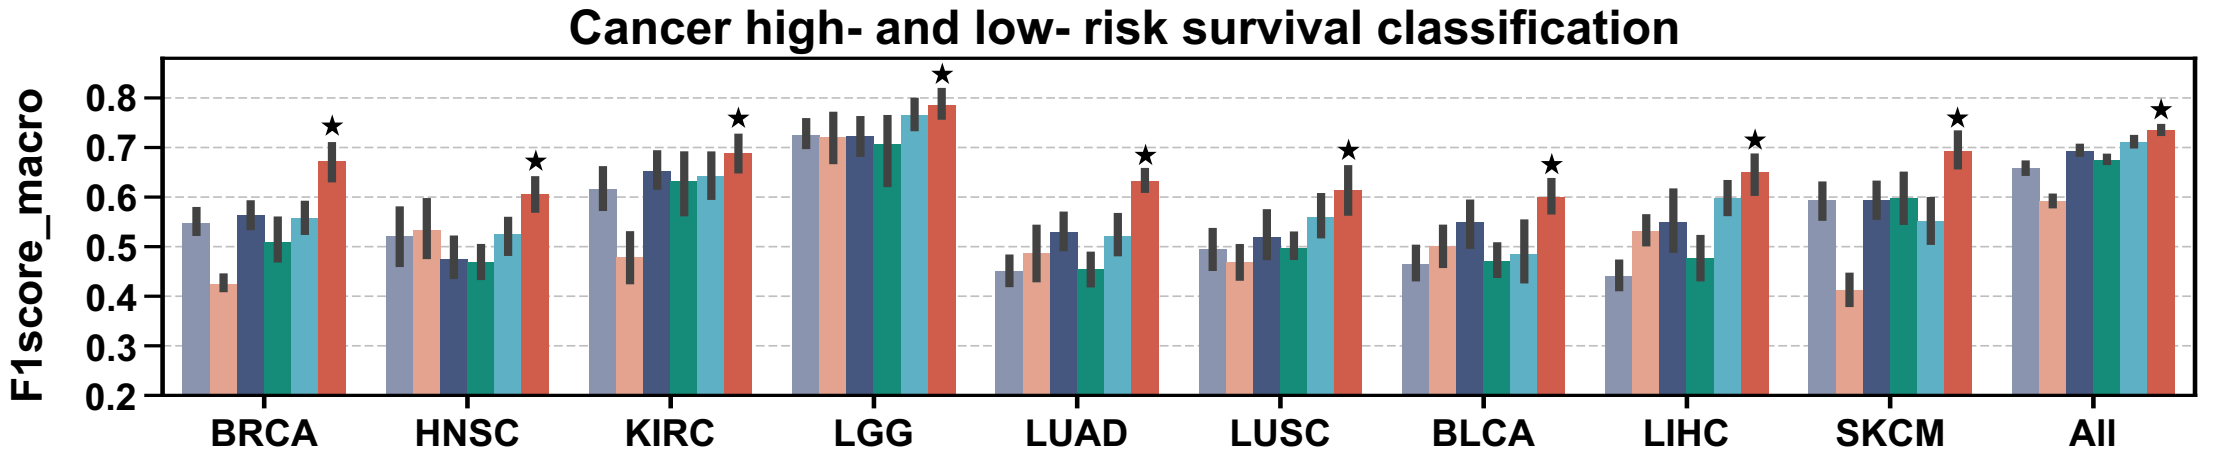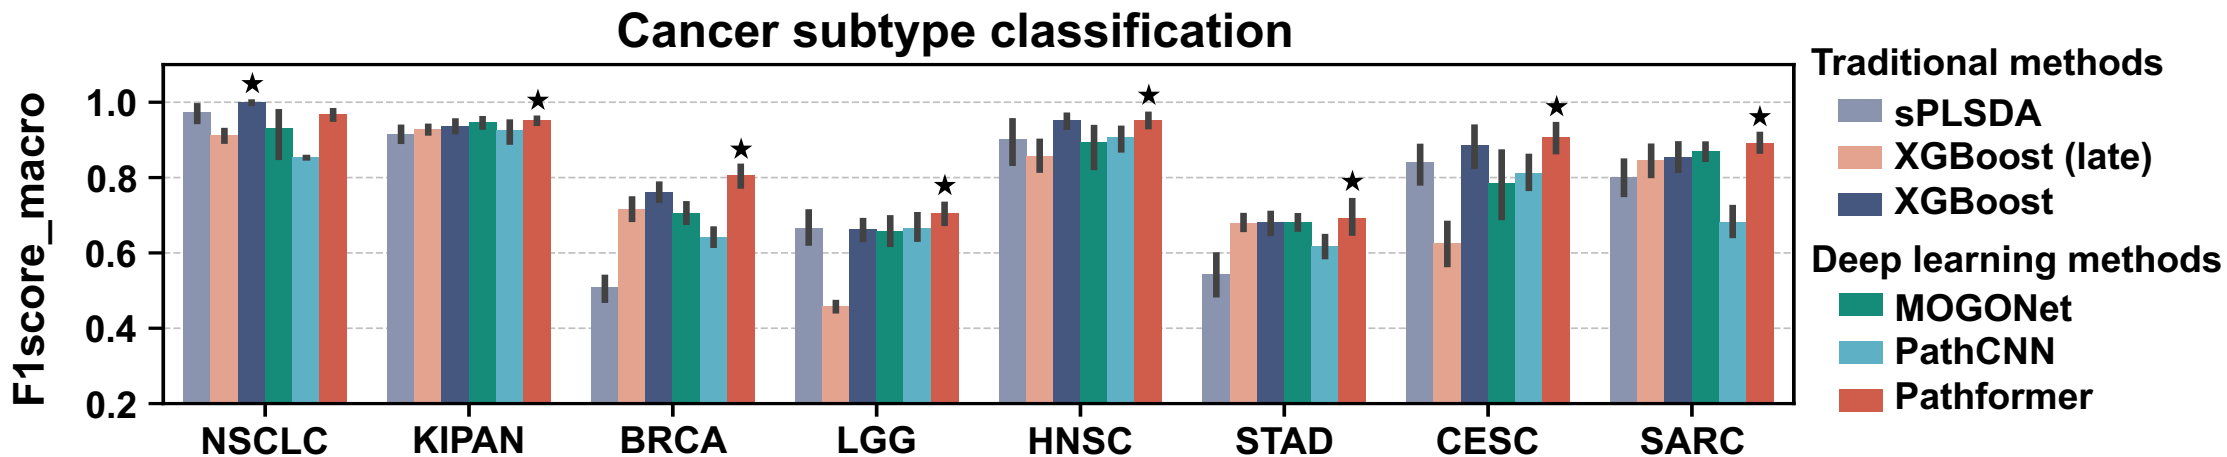

**Traditional methods**

- sPLSDA
- XGBoost (late)
- XGBoost

**Deep learning methods**

- MOGONet
- PathCNN
- Pathformer

Figure 3. Ablation analysis of Pathformer for the classification of early- and late-stage cancer patients.

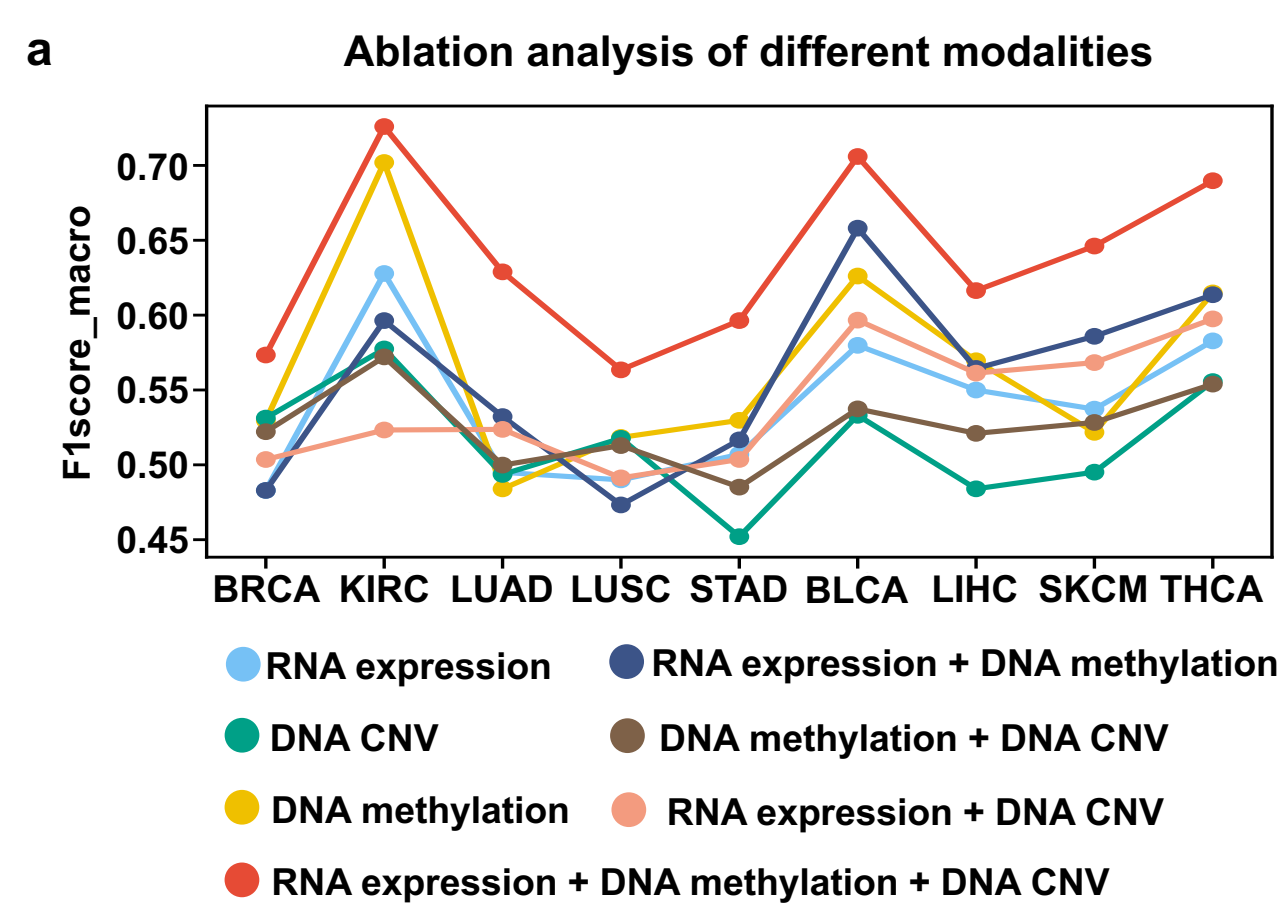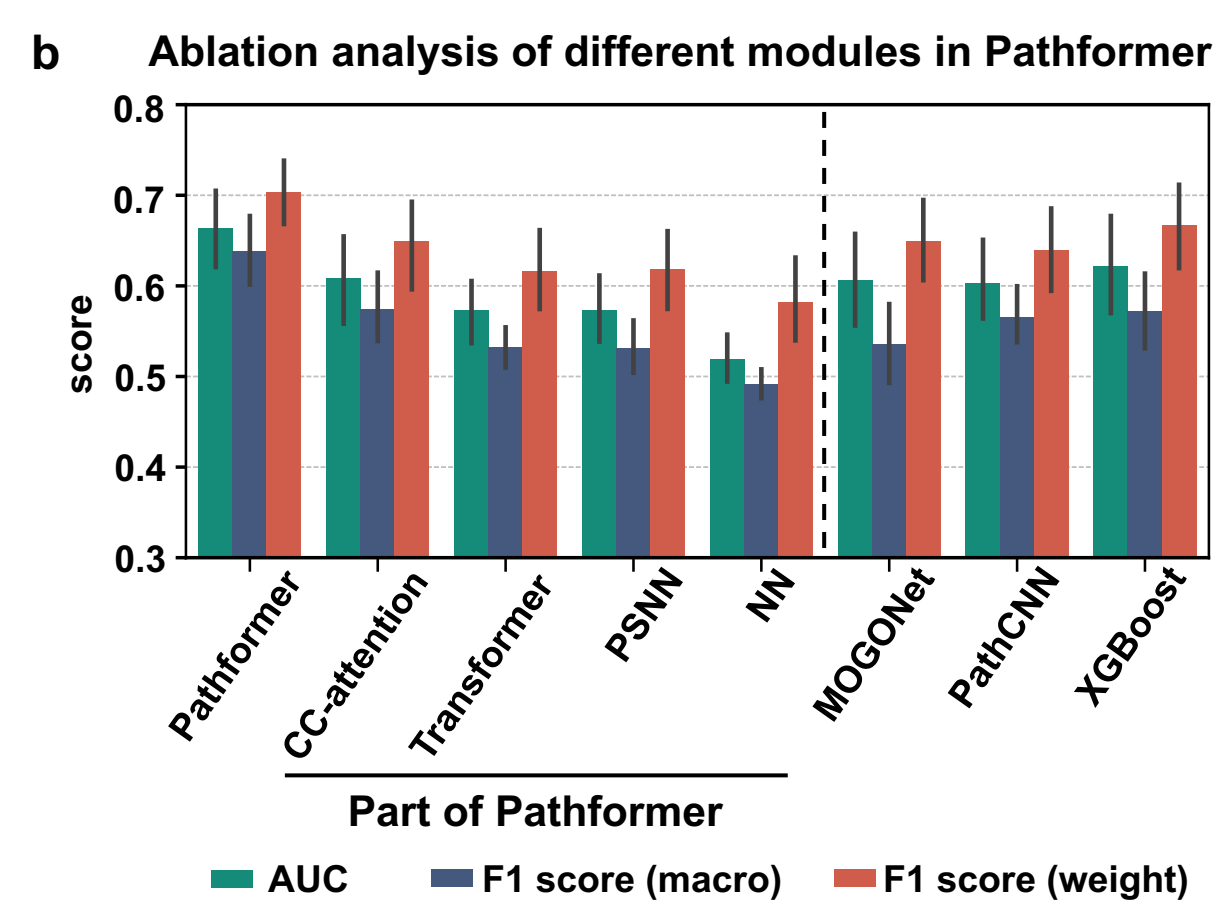

Figure 4. Breast cancer subtype related modalities, pathways and genes revealed by Pathformer

a

### Contributions of different modalities on BRCA subtype classification

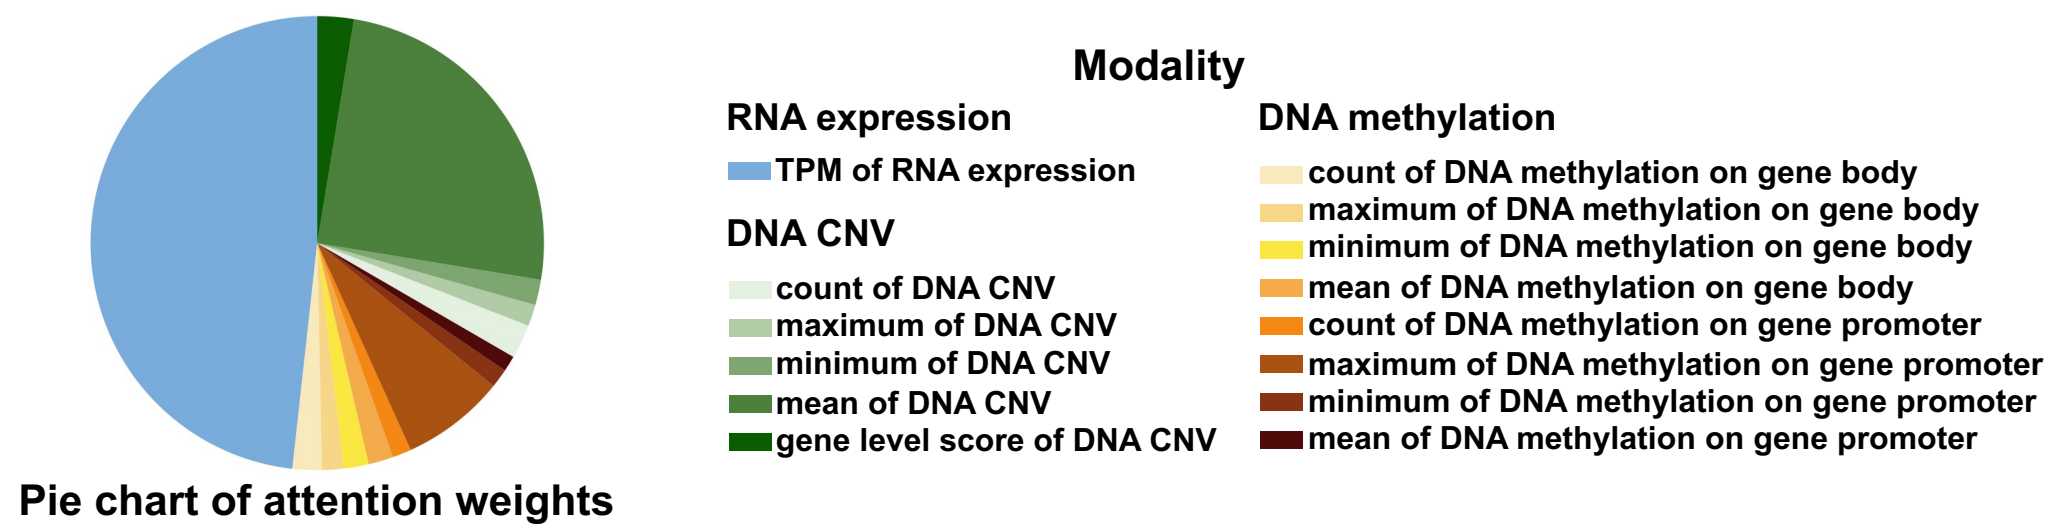

b

### Important pathways and key genes on BRCA subtype classification by SHAP value

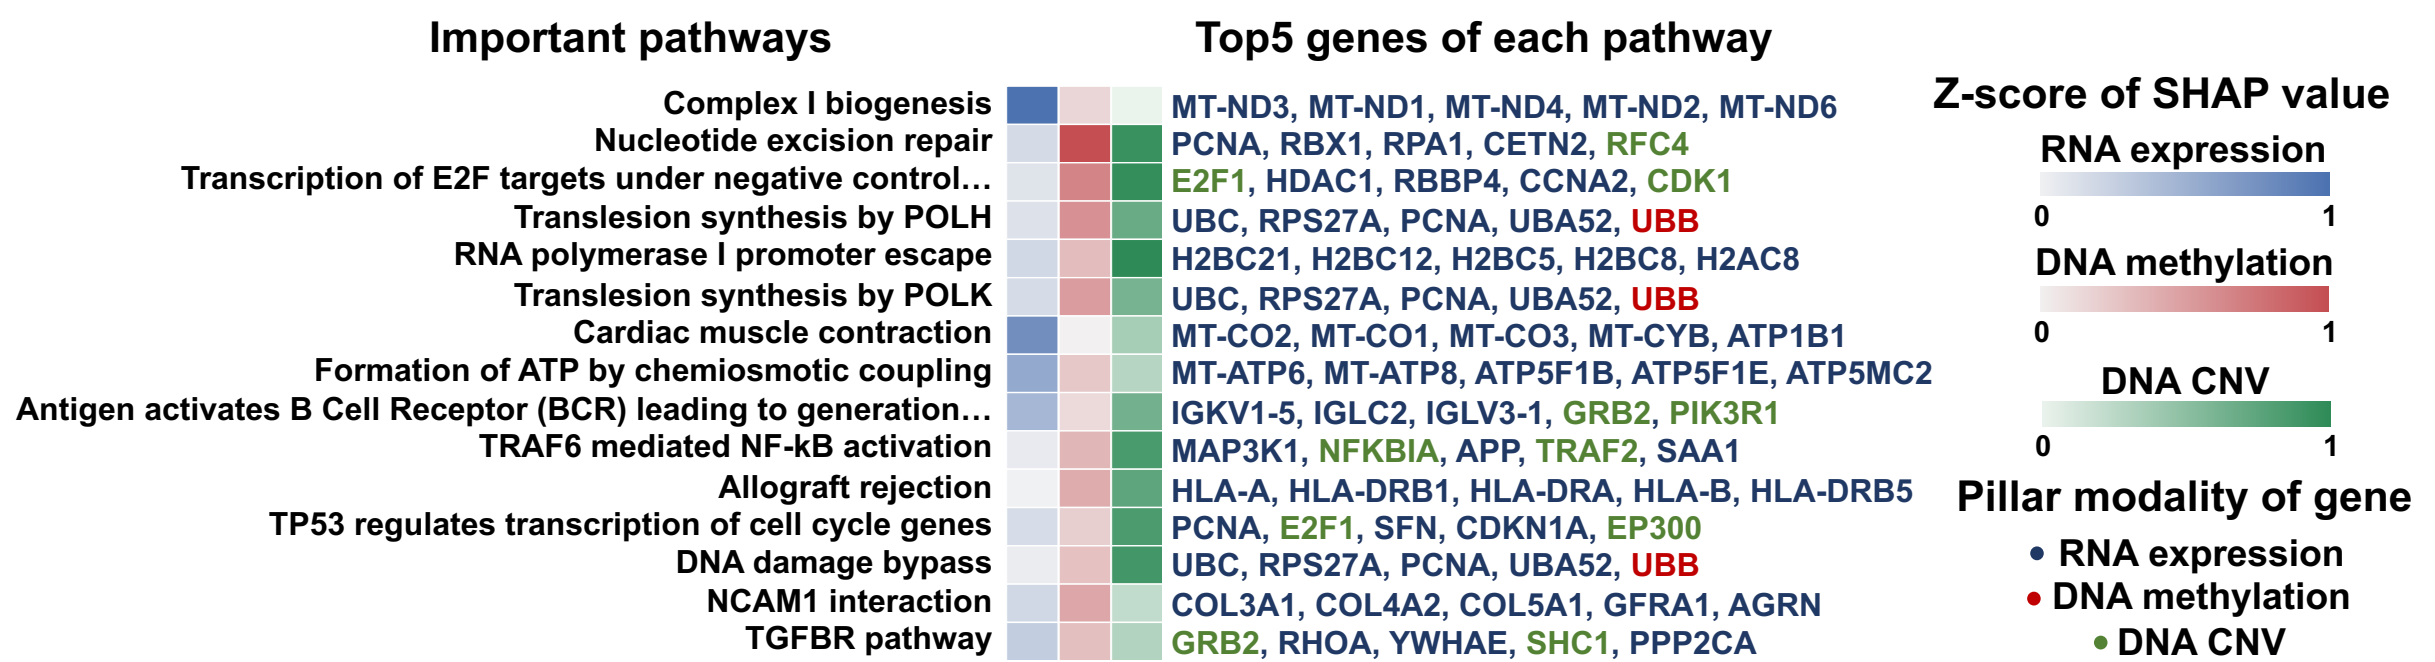

c

### Hub module of the updated pathway crosstalk network on BRCA subtype classification

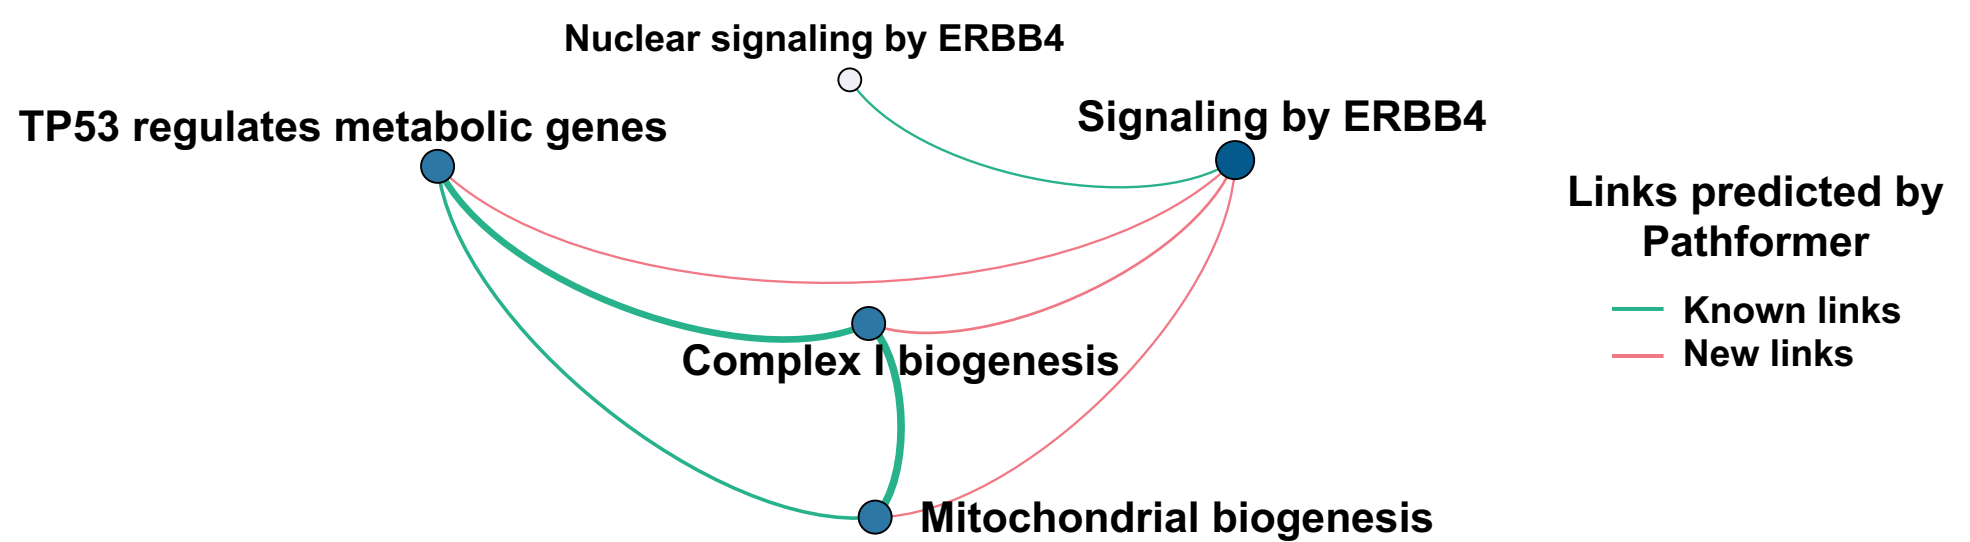

Figure 5. Pathformer integrates multi-modal liquid biopsy data for non-invasive cancer diagnosis

a

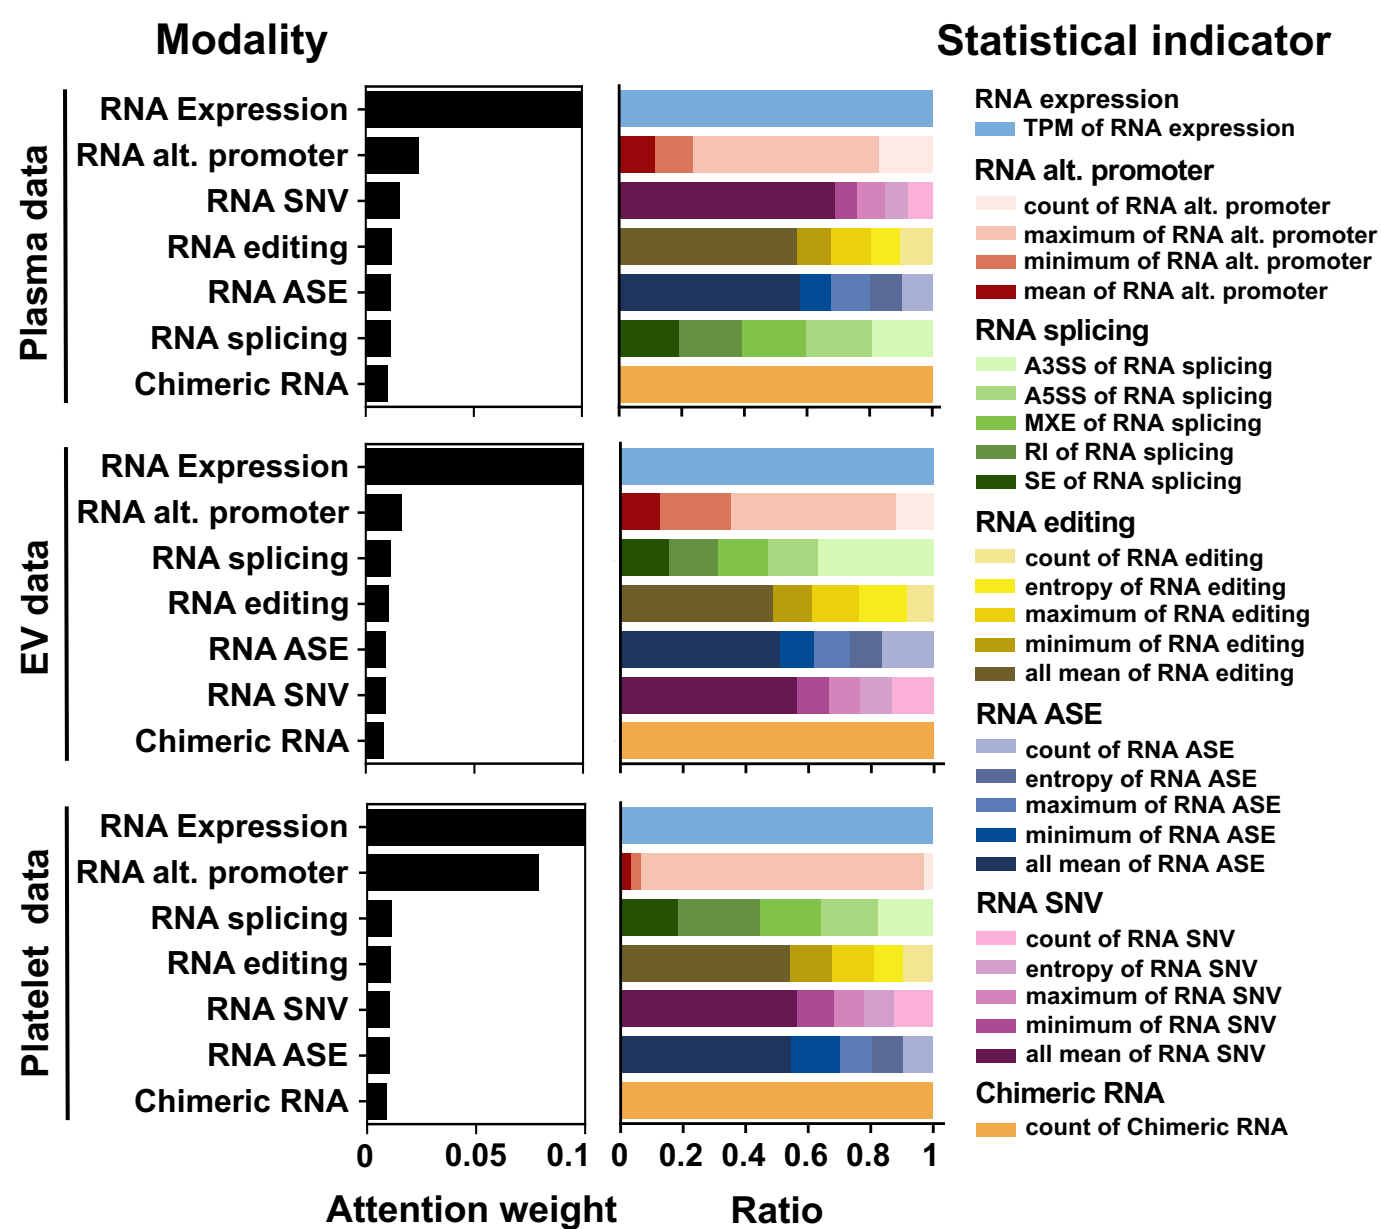

b

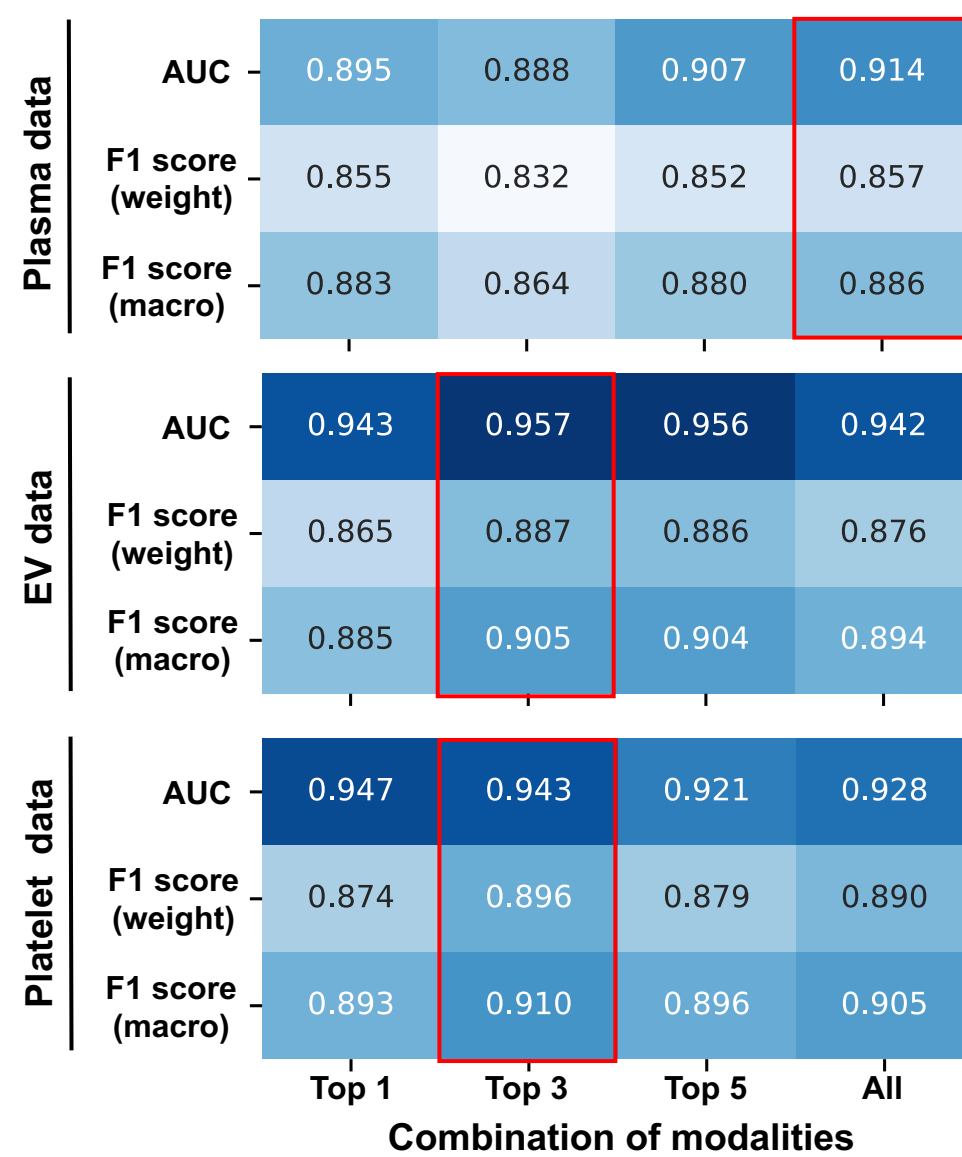



Figure 6. Interpretation of the liquid biopsy data using Pathformer

**a Important pathways and key genes on plasma data classification by SHAP**

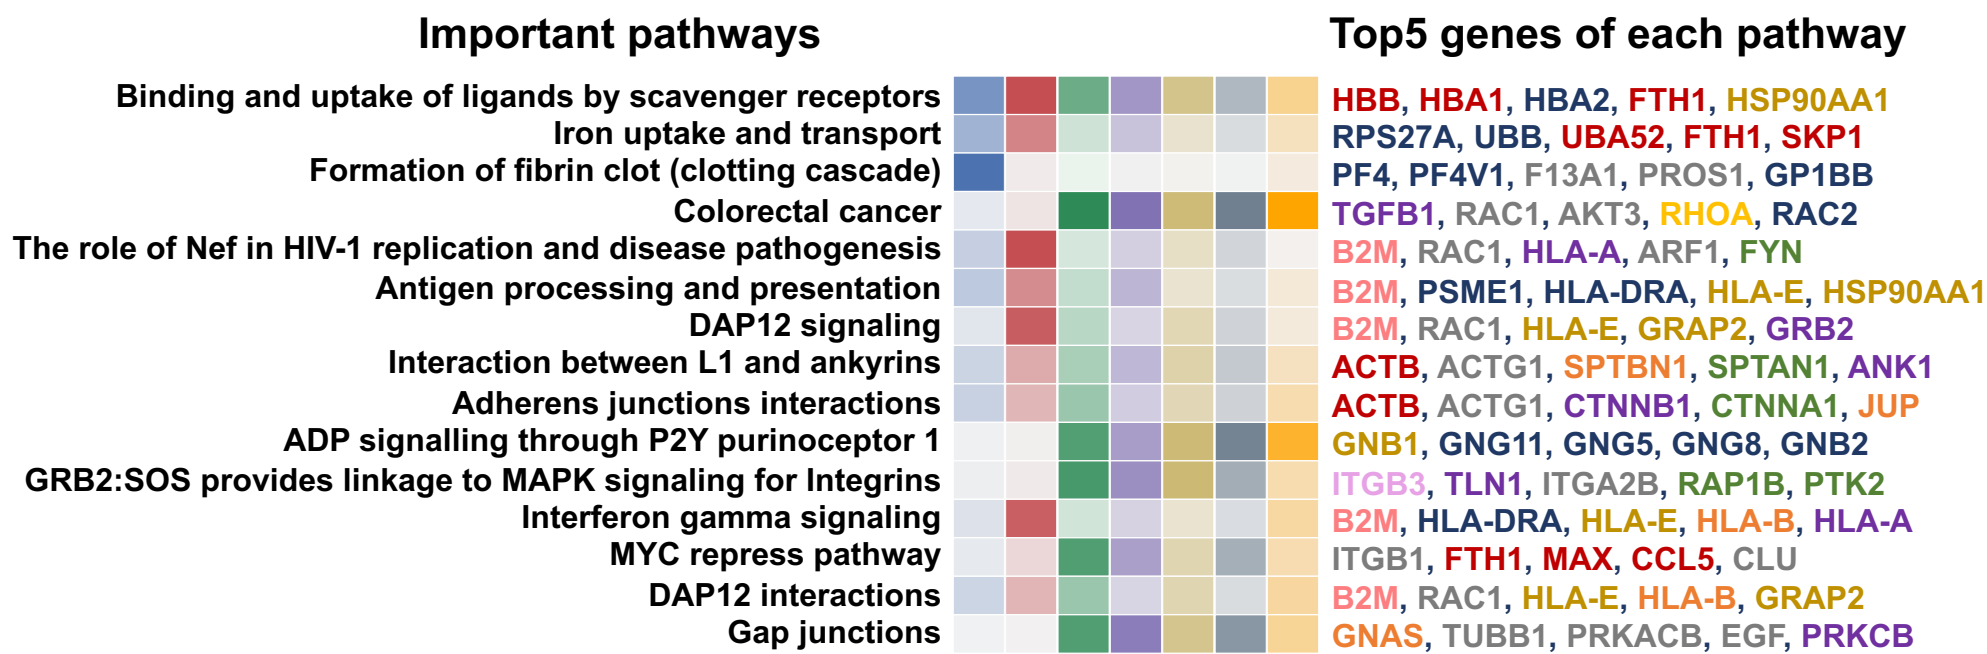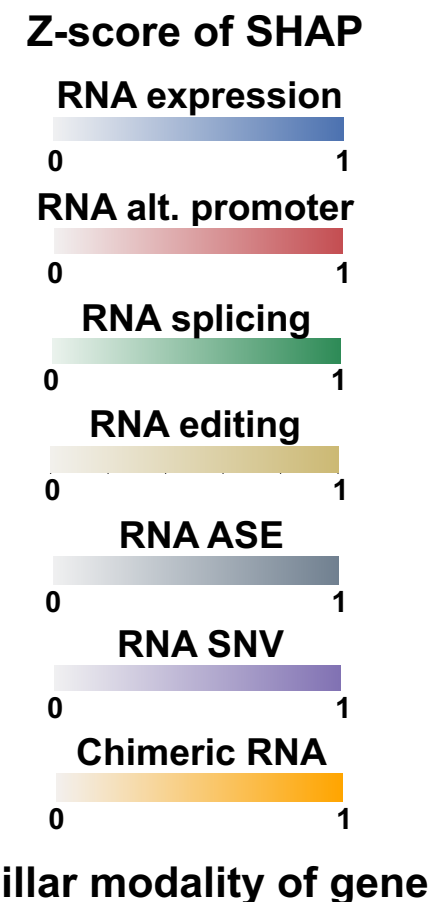

**b Important pathways and key genes on EV data classification by SHAP**

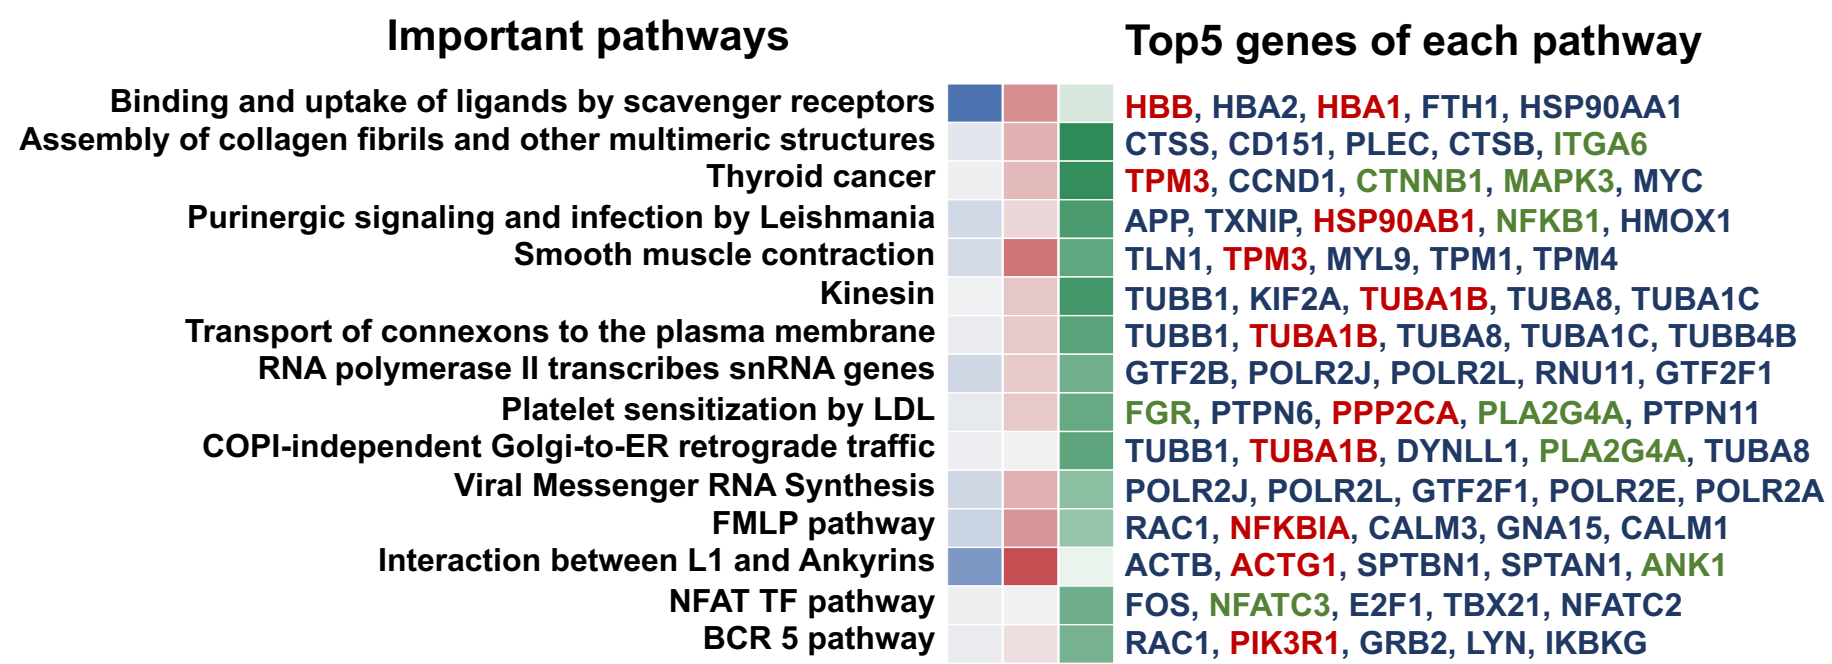

**c Important pathways and key genes on platelet data classification by SHAP**

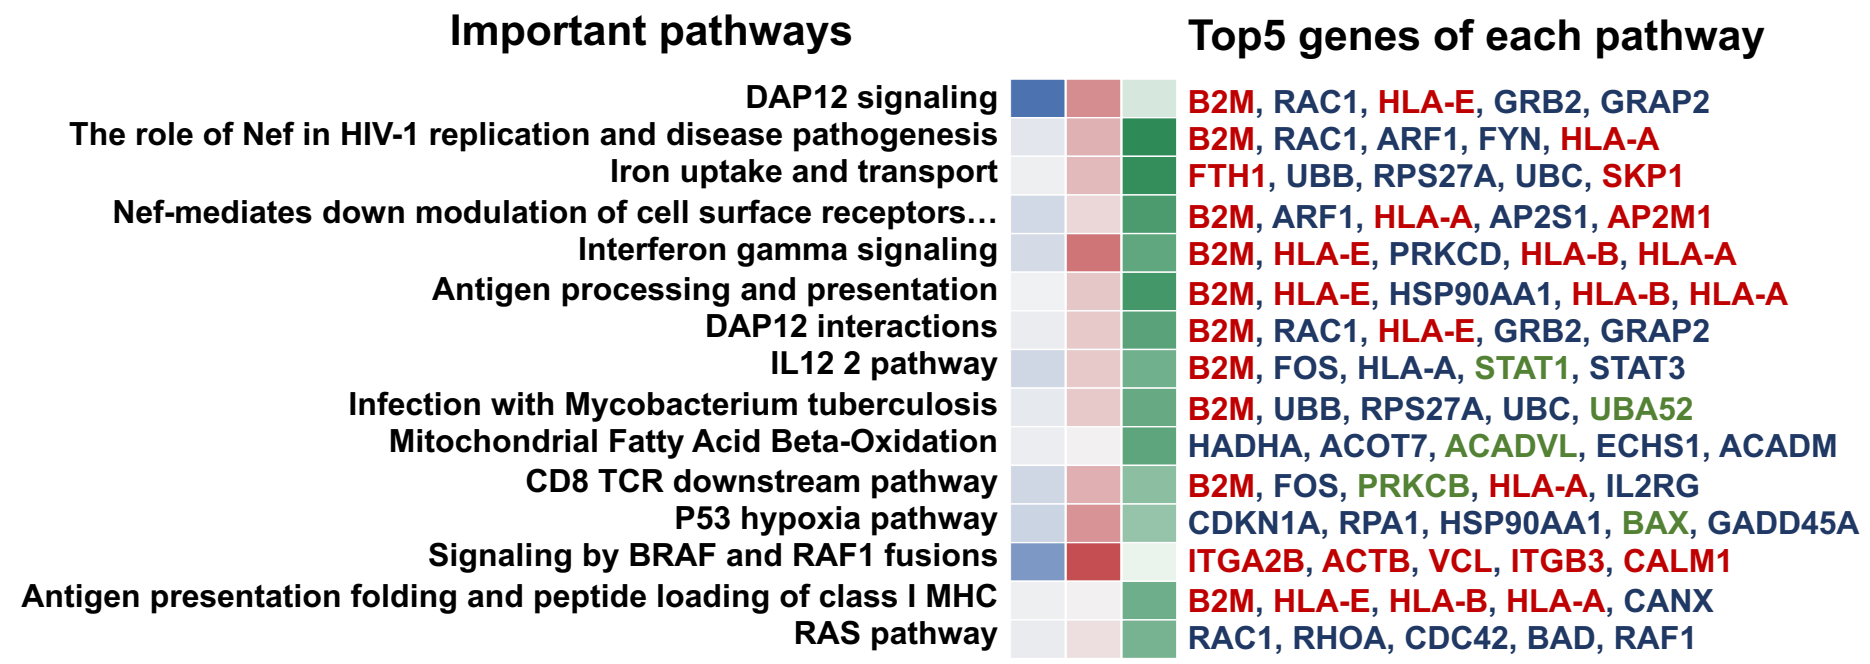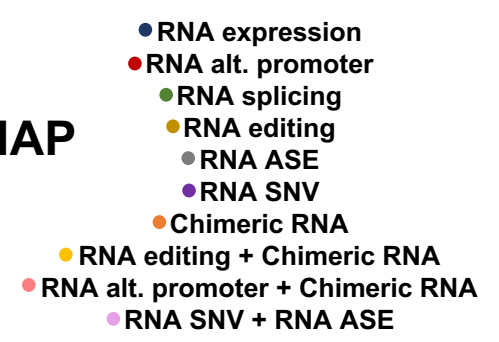

**d Hub module of the updated pathway crosstalk network for plasma data classification**

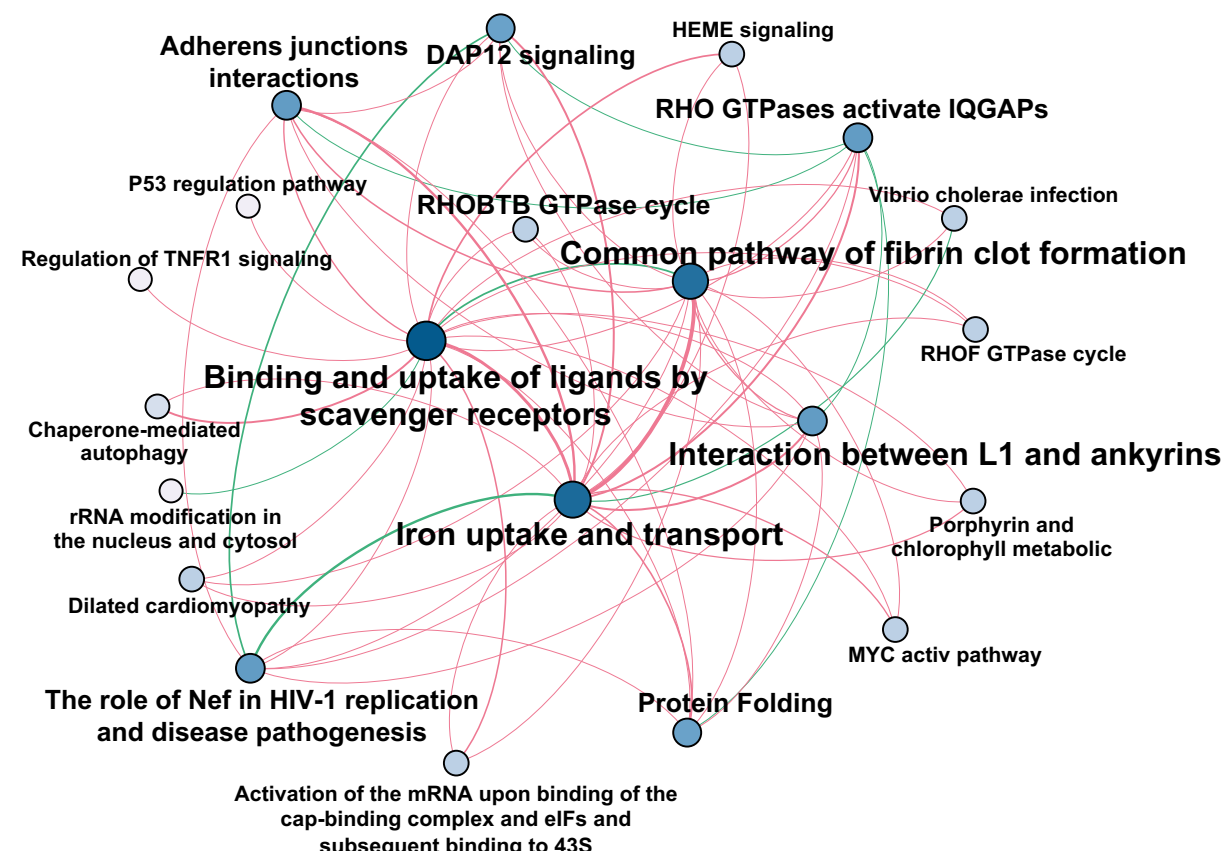

**e Hub module of the updated pathway crosstalk network for platelet data classification**

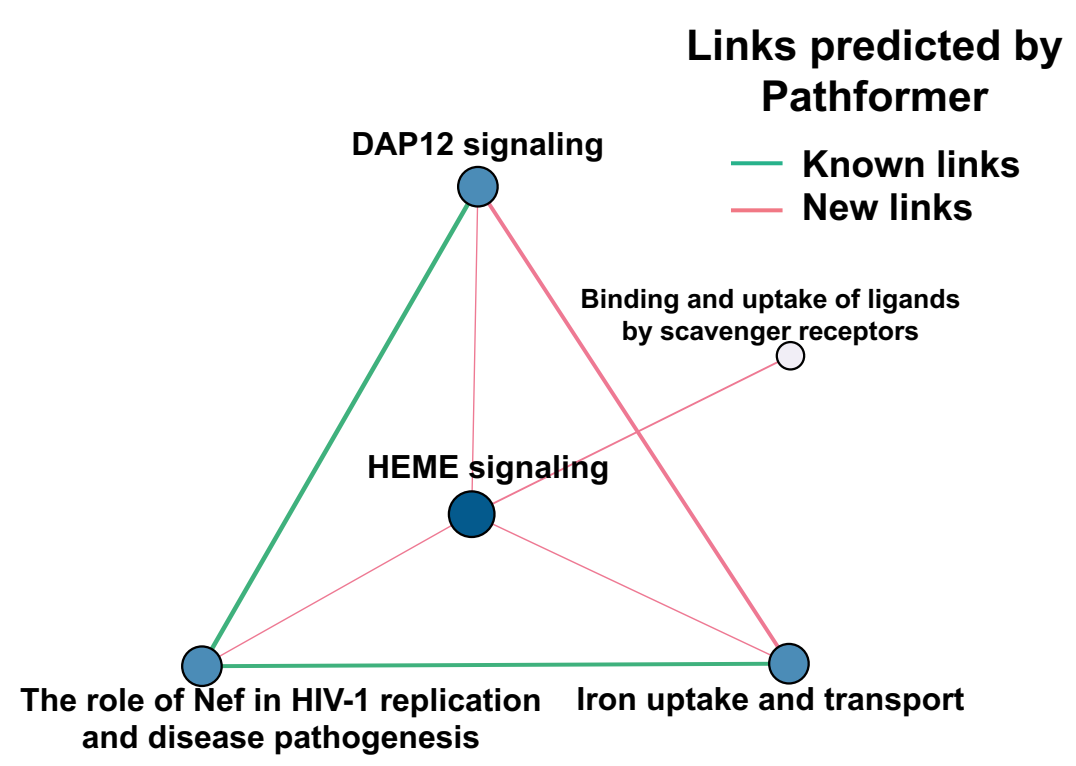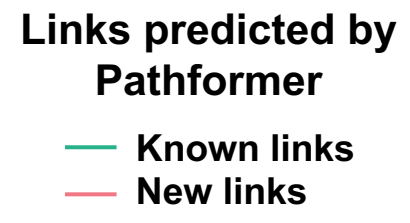

Source: https://www.biorxiv.org/content/10.1101/2023.05.23.541554v1.full.pdf
